# Supplementary material
Source: Springer Nature journal article supplement (https://www.springermedizin.de/resource/supplementary/13002_2006_81_MOESM2_ESM.pdf/9627116)
Supplement: MOESM2 [file 9627116]

Table 2. Sicilian vernacular names of the recorded wild food plants

| Scientific name and botanical family                         | Sicilian vernacular name                                                                                                                                                                                                                                                                                                                                                                                                                                                                                                                                                                                                                                                          |
|--------------------------------------------------------------|-----------------------------------------------------------------------------------------------------------------------------------------------------------------------------------------------------------------------------------------------------------------------------------------------------------------------------------------------------------------------------------------------------------------------------------------------------------------------------------------------------------------------------------------------------------------------------------------------------------------------------------------------------------------------------------|
| <i>Agave americana</i> L.<br>( <i>Agavaceae</i> )            | <b>Zamara</b> (EN-Piazza Armerina)                                                                                                                                                                                                                                                                                                                                                                                                                                                                                                                                                                                                                                                |
| <i>Allium ampeloprasum</i> L.<br>( <i>Liliaceae</i> )        | <b>Agghiastru</b> (CT-Randazzo, Bronte)<br><b>Agghiu porru</b> (CT-Adrano, Milo, Linguaglossa, Nicolosi, Ragaina, Zafferana)<br><b>Aggiuru</b> (CT-Randazzo)<br><b>Cipuddazzu</b> (CT-Nicolosi, Pedara)<br><b>Ghiastru</b> (CT-Bronte)<br><b>Porru</b> (AG-Montallegro, Realmonte)<br><b>Puorru sarvaggiu</b> (RG-Vittoria, Ragusa)<br><b>Purri</b> (EN-Piazza Armerina)<br><b>Purrietti</b> (ME-Mistretta)<br><b>Purru</b> (CL-Butera, Riesi)                                                                                                                                                                                                                                    |
| <i>Allium nigrum</i> L.<br>( <i>Liliaceae</i> )              | <b>Porra</b> (AG-Cattolica Eraclea)                                                                                                                                                                                                                                                                                                                                                                                                                                                                                                                                                                                                                                               |
| <i>Allium roseum</i> L.<br>( <i>Liliaceae</i> )              | <b>Porru</b> (AG-Canicattì, Campobello di Licata, Ravanusa)                                                                                                                                                                                                                                                                                                                                                                                                                                                                                                                                                                                                                       |
| <i>Allium sativum</i> L.<br>( <i>Liliaceae</i> )             | <b>Agghia</b> (AG, CL, CT, EN, ME, RG, SR, TP)                                                                                                                                                                                                                                                                                                                                                                                                                                                                                                                                                                                                                                    |
| <i>Allium schoenoprasum</i> L.<br>( <i>Liliaceae</i> )       | <b>Erva cipuddrina</b> (AG-Montallegro, Realmonte)                                                                                                                                                                                                                                                                                                                                                                                                                                                                                                                                                                                                                                |
| <i>Allium triquetrum</i> L.<br>( <i>Liliaceae</i> )          | <b>Porrua</b> (AG-Sambuca di Sicilia)<br><b>Pràs</b> (PA-Contessa Entellina)                                                                                                                                                                                                                                                                                                                                                                                                                                                                                                                                                                                                      |
| <i>Amaranthus retroflexus</i> L.<br>( <i>Amaranthaceae</i> ) | <b>Lippia</b> (RG-Vittoria)                                                                                                                                                                                                                                                                                                                                                                                                                                                                                                                                                                                                                                                       |
| <i>Ammi majus</i> L.<br>( <i>Apiaceae</i> )                  | <b>Sberra, Caliota</b> (CL-Butera)                                                                                                                                                                                                                                                                                                                                                                                                                                                                                                                                                                                                                                                |
| <i>Anthemis precox</i> L.<br>( <i>Asteraceae</i> )           | <b>Cucumidda, Pani cavaddu</b> (AG-Licata)                                                                                                                                                                                                                                                                                                                                                                                                                                                                                                                                                                                                                                        |
| <i>Apium graveolens</i> L.<br>( <i>Apiaceae</i> )            | <b>Accia</b> (CL-Santa Caterina Villermosa, Vallelunga Pratameno); (PA-Caccamo, Scalfani Bagni, Valledolmo, Ustica); (TP)                                                                                                                                                                                                                                                                                                                                                                                                                                                                                                                                                         |
| <i>Apium nodiflorum</i> L.<br>( <i>Apiaceae</i> )            | <b>Crisciuni</b> (AG-Bivona)<br><b>Scavuna</b> (ME-Mistretta)                                                                                                                                                                                                                                                                                                                                                                                                                                                                                                                                                                                                                     |
| <i>Arabis turrata</i> L.<br>( <i>Brassicaceae</i> )          | <b>Mazareddra duci</b> (CL-Caltanissetta, San Cataldo, Serradifalco)                                                                                                                                                                                                                                                                                                                                                                                                                                                                                                                                                                                                              |
| <i>Arbutus unedo</i> L.<br>( <i>Ericaceae</i> )              | <b>Corbezzulu</b> (PA-Cefalù)<br><b>M'briacotti</b> (EN-Piazza Armerina)<br><b>M'briacheddi</b> (ME-Filicudi, Vulcano)<br><b>Acummaru</b> (ME-Panarea, Salina)                                                                                                                                                                                                                                                                                                                                                                                                                                                                                                                    |
| <i>Asparagus acutifolius</i> L.<br>( <i>Liliaceae</i> )      | <b>Asparaci</b> (AG-Licata)<br><b>Sparaci</b> (Pa-Ustica)<br><b>Sparaci finu</b> (TP- Valderice)<br><b>Sparaci sarbaggiu</b> (AG- Montallegro, Realmonte)<br><b>Sparaci servaggi</b> (ME-Messina, Mistretta, Santo Stefano di Camastra)<br><b>Sparacia</b> (TP-Calatafimi, Campobello di Mazara Castelvetro, Salemi, San Vito Lo Capo); (CT-Bronte)<br><b>Sparaciara</b> (CT-Bronte, Randazzo)<br><b>Sparaciara</b> (CT-Randazzo)<br><b>Sparacieddu</b> (CL-Campofranco, Sutera)<br><b>Sparacio</b> (SR -Pachino)<br><b>Sparacio</b> (SR-Pachino)<br><b>Sparaciu sarvaggiu</b> (TP-Riserva dello Zingaro)<br><b>Sparaciu</b> (CL-Butera, Mazzarino, Riesi, Sommatino); (TP-Erice, |

|                                                                     |                                                                                                                                                                                                                                                                                                                                                                                                                                                                                                                                                                                                                                                                                                                                                                                                                                                                                                                                                                                                                                                                                                                                                                                                       |
|---------------------------------------------------------------------|-------------------------------------------------------------------------------------------------------------------------------------------------------------------------------------------------------------------------------------------------------------------------------------------------------------------------------------------------------------------------------------------------------------------------------------------------------------------------------------------------------------------------------------------------------------------------------------------------------------------------------------------------------------------------------------------------------------------------------------------------------------------------------------------------------------------------------------------------------------------------------------------------------------------------------------------------------------------------------------------------------------------------------------------------------------------------------------------------------------------------------------------------------------------------------------------------------|
|                                                                     | <p>Riserva dello Zingaro); (CT-Maletto, Randazzo)<br/> <b>Sparaciù</b> (CT-Randazzo)<br/> <b>Sparaciu</b> (RG-Vittoria); (AG- Burgio, Lucca Sicula, Sambuca di Sicilia, Villafranca Sicula)<br/> <b>Sparaciu</b> (TP-Custonaci, Vita); (CT-Maletto)<br/> <b>Sparaciu niuru</b> (TP-Vita); (CT-Nicolosi, Biancavilla, Ragaina, Belpasso); (AG-Lampedusa, Linosa)<br/> <b>Sparaciu sarbaggiu</b> (CL- Caltanissetta, San Cataldo, Serradifalco)<br/> <b>Sparaciu sarbaggiu</b> (CT-Castiglione)<br/> <b>Sparaciu scuru</b> (CT-Ragaina)<br/> <b>Sparaciu spinusu</b> (CT-Castiglione)<br/> <b>Sparacogna</b> (CT- Acireale Catania)<br/> <b>Sparacogna</b> (CT-Catania, Acireale, Pedara, S.Giovanni la Punta, Nicolosi, Ragaina, Zaffarana, Belpasso, Santa Venerina)<br/> <b>Sparangiu</b> (EN-Piazza Armerina)<br/> <b>Spariciu</b> (RG-Vittoria)<br/> <b>Spina ri puci</b> (Tp-Erice, Gibellina , Levanzo)<br/> <b>Spinapucciu</b> (CT-Linguaglossa, Castiglione)<br/> <b>Spinapuggiu</b> (CT-Linguaglossa, Castiglione)<br/> <b>Spinapulici</b> (CT-Milo, Giarre, Pedara, Nicolosi, S. Venerina, Zafferana)<br/> <b>Spini du bamminu</b> (CT-Adrano)<br/> <b>Spinipuggiu</b> (CT-Linguaglossa)</p> |
| <i>Asparagus albus</i> L.<br>( <i>Liliaceae</i> )                   | <p><b>Sparaci</b> (PA-Ustica); (Tp-Favignana, Levanzo)<br/> <b>Sparaciu spinosu</b> (TP-Riserva dello Zingaro)<br/> <b>Sparaciu sarvaggiuu</b> (TP-Riserva dello Zingaro)<br/> <b>Sparacogna</b> (CT-Adrano Ragaina)<br/> <b>Sparaciu</b> (AG-Cattolica Eraclea)<br/> <b>Sparaciu jancu</b> (CT- Belpasso, Bronte, Biancavilla)</p>                                                                                                                                                                                                                                                                                                                                                                                                                                                                                                                                                                                                                                                                                                                                                                                                                                                                   |
| <i>Asparagus officinalis</i> L.<br>( <i>Liliaceae</i> )             | <p><b>Sparaciu</b> (AG-Bivona, Cammarata)<br/> <b>Sparaciu manzu</b> (CT-Adrano, Bronte, Linguaglossa, Maletto, Randazzo, Zafferana)<br/> <b>Sparaciu 'mpiriali</b> (CT-Castiglione, Nicolosi)<br/> <b>Sparaciù di vigna</b> (CT-Zafferana)</p>                                                                                                                                                                                                                                                                                                                                                                                                                                                                                                                                                                                                                                                                                                                                                                                                                                                                                                                                                       |
| <i>Asphodeline lutea</i> L.<br>( <i>Liliaceae</i> )                 | <p><b>Baffalupo</b> (TP-Riserva dello Zingaro)<br/> <b>Baffaluchi</b> (ME- Messina Mistretta,)<br/> <b>Battaghiori</b> (CT-Maletto)<br/> <b>Garufi</b> (AG-Bivona)<br/> <b>Garufu</b> (PA-Bisaquino)<br/> <b>Musuluchi</b> (TP-Busetto Palizzolo, Campobello di Ma zara)<br/> <b>Puddicina</b> (AG-Cianciana)<br/> <b>Puddicini</b> (AG-Aragona, Sambuca di Sicilia)<br/> <b>Puddicinu</b> (AG-Comitini, Raffadali, Sant'Angelo Muxaro, San Biagio Platani, Burgio, Lucca Sicula. Villafranca Sicula)<br/> <b>Scannabeccu</b> (CT-Pedara, Regaina)<br/> <b>Scornabeccu</b> (AG-Montevago); (TP-Partanna); (CT-Nicolosi, Regaina Zafferana)<br/> <b>U' puddicinu</b> (AG-Raffadali)<br/> <b>Zzubbi</b> (CT-Adrano, Biancavilla, Bronte, Maletto, Randazzo)</p>                                                                                                                                                                                                                                                                                                                                                                                                                                         |
| <i>Asphodelus microcarpus</i> Salzm.et Viv.<br>( <i>Liliaceae</i> ) | <p><b>Agghiu porru</b> (ME-Filicudi, Panarea, Vulcano)<br/> <b>Agghiu porru, Purrazzu</b> (ME-Salina)</p>                                                                                                                                                                                                                                                                                                                                                                                                                                                                                                                                                                                                                                                                                                                                                                                                                                                                                                                                                                                                                                                                                             |
| <i>Atractylis gummifera</i> L.<br>( <i>Asteraceae</i> )             | <b>Masticogna</b> (ME); (CT-Bronte)                                                                                                                                                                                                                                                                                                                                                                                                                                                                                                                                                                                                                                                                                                                                                                                                                                                                                                                                                                                                                                                                                                                                                                   |
| <i>Barlia robertiana</i> Loisel.<br>( <i>Orchidaceae</i> )          | <b>Patatara, Peri di patatara</b> (CT-S. Pietro di Caltagirone)                                                                                                                                                                                                                                                                                                                                                                                                                                                                                                                                                                                                                                                                                                                                                                                                                                                                                                                                                                                                                                                                                                                                       |
| <i>Bellis perennis</i> L.<br>( <i>Asteraceae</i> )                  | <p><b>Erva di primu ciuri</b> (CT-Linguaglossa)<br/> <b>Erba bianca</b> (CT-Maletto)<br/> <b>Jancuzzu</b> (CT-Nicolosi)<br/> <b>Primusciuri</b> (CT-San Giovanni La Punta)</p>                                                                                                                                                                                                                                                                                                                                                                                                                                                                                                                                                                                                                                                                                                                                                                                                                                                                                                                                                                                                                        |
| <i>Beta vulgaris</i> L. subsp. <i>maritima</i> (L.)<br>Arcang.      | <p><b>Aggiti</b> (RG-Vittoria)<br/> <b>Agiri</b> (EN-Piazza Armerina)</p>                                                                                                                                                                                                                                                                                                                                                                                                                                                                                                                                                                                                                                                                                                                                                                                                                                                                                                                                                                                                                                                                                                                             |

|                                                                                    |                                                                                                                                                                                                                                                                                                                                                                                                                                                                                                                                                                                                                                                                                                                                                                                                                                                                                                                                                                                                                                                                                                                                                                                                                                                                                                                                                                    |
|------------------------------------------------------------------------------------|--------------------------------------------------------------------------------------------------------------------------------------------------------------------------------------------------------------------------------------------------------------------------------------------------------------------------------------------------------------------------------------------------------------------------------------------------------------------------------------------------------------------------------------------------------------------------------------------------------------------------------------------------------------------------------------------------------------------------------------------------------------------------------------------------------------------------------------------------------------------------------------------------------------------------------------------------------------------------------------------------------------------------------------------------------------------------------------------------------------------------------------------------------------------------------------------------------------------------------------------------------------------------------------------------------------------------------------------------------------------|
| <p>(<i>Chenopodiaceae</i>)</p>                                                     | <p><b>Biletti</b> (CL-S.Caterina Villermosa)<br/> <b>Geri</b> (CT-Biancavilla)<br/> <b>Gidi</b> (AG-Bivona, Cianciana)<br/> <b>Gira</b> (TP-Busetto Palizzolo, Castellammare del Golfo. Custonaci, Favignana, San Vito lo Capo, Valderice, Riserva dello Zingaro); (CT-Adrano, Randazzo); (ME-Mistretta, Tortorici)<br/> <b>Gira di marina</b> (TP-Favignana)<br/> <b>Giri</b> (CT-Maletto, Bronte, Regaina); (AG-Sambuca di Sicilia, S. Caterina Villermosa, Isole Pelagie); (PA-Ustica); (TP-Calatafimi, Campobello di Mazara, Gibellina, Salemi, Vita, Riserva dello Zingaro)<br/> <b>Sarchi</b> (AG-Casteltermini, S. Giovanni Gemini)<br/> <b>Secala</b> (CT-Nicolosi, Pedara, Zafferana, Linguaglossa, Castiglione, Belpasso)<br/> <b>Secala sarbaggia</b> (CT- Milo, S.Giovanni la Punta, S.Venerina,)<br/> <b>Seghila</b> (CT-Linguaglossa)<br/> <b>Zarca</b> (Butera, Mazzarino, Riesi, Sommatino); (AG-Licata, Raffadali)<br/> <b>Zarca sarbaggia</b> (AG-Siculiana)<br/> <b>Zarchi</b> (ME-Santo Stefano di Camastra); (AG-Isole Pelagie)<br/> <b>Zarchi sarbaggi</b> (AG-Campofranco, S. Angelo Muxaro)<br/> <b>Zarchi sarvaggi</b> (AG-Cattolica Eraclea)<br/> <b>Zarchitedda</b> (AG-Aragona)<br/> <b>Zarchiteddi di campagna</b> (AG-Favara)<br/> <b>Zarchiteddi di giri</b> (AG-Comitini)<br/> <b>Zarchiteddra</b> (AG-Realmonte, Montallegro)</p> |
| <p><i>Beta vulgaris</i> L. subsp. <i>vulgaris</i><br/> (<i>Chenopodiaceae</i>)</p> | <p><b>Gira sarvaggia</b> (TP-Favignana)<br/> <b>Giri</b> (ME-Messina)<br/> <b>Zalaca</b> (TP-Castelvetrano, Partanna, Poggio Reale, Salaparuta)<br/> <b>Zarca</b> (AG-Raffadali)</p>                                                                                                                                                                                                                                                                                                                                                                                                                                                                                                                                                                                                                                                                                                                                                                                                                                                                                                                                                                                                                                                                                                                                                                               |
| <p><i>Borago officinalis</i> L.<br/> (<i>Boraginaceae</i>)</p>                     | <p><b>Bburraina</b> (AG-Comitini, Favara , Bivona); (ME-Galati Mamertino, Longi, S.Marco di Alunzio, Santa Agata di Militello, Tortorici)<br/> <b>Bburraina</b> (CT-Linguaglossa, Castiglione, Randazzo, Maletto Bronte)<br/> <b>Burraina,Vurraina</b> (AG-Realmonte, Montallegro, Canicatti)<br/> <b>Burraini</b> (AG-Bivona)<br/> <b>Burrana</b> (AG-Burgio, Lucca Sicula, Villafranca Sicula)<br/> <b>Burrania</b> (TP-Busetto Palizzoloto, Calatafimi, Pantelleria); (PA-Bisaquino); (AG- Aragona, Cattolica Eraclea, Comitini, Favara, Raffadali, Sant'Angelo Muxaro, Siculiana, Montevago); (TP-Trapani)<br/> <b>Burranii</b> (AG-Raffadali, Lampedusa), (Me-Santo Stefano di Camastra); (TP-Favignana, Levanzo, Marittimo)<br/> <b>Urrania</b> (CT-Nicolosi, S.Giovanni la Punta, Pedara, Zafferana, Biancavilla, Regaina, Belpasso)<br/> <b>Vurraiina</b> (RG-Vittoria)<br/> <b>Vurraina</b> (ME-Mistretta, Isole Eolie) ; (CL-Caltanissetta); (AG-Sant'Angelo Muxaro); (Me- Messina), (PA-Ustica)<br/> <b>Vurraini</b> (AG-Cammarata); (CL-Mussumeli)<br/> <b>Vurrania</b> (TP-Riserva dello Zingaro)<br/> <b>Vurrania</b> (AG-Licata, Casteltermini); (CT- Adrano , Milo, Nicolosi, S. Venerina, Zafferana); (RG-Vittoria) ; (TP-Calatafimi, Salemi, Vita, Zingaro); (ME-Tusa); (AG-Campobello di Licata, Canicatti, Ravanusa)</p>                       |
| <p><i>Brassica fruticulosa</i> Cyr.<br/> (<i>Brassicaceae</i>)</p>                 | <p><b>Caliceddu</b> (CT-Adrano)<br/> <b>Caliceddu</b> (CT-Pedara, Biancavilla, Regaina)<br/> <b>Caluceddu</b> (CT-Adrano, Belpasso, Nicolosi)<br/> <b>Cauliceddu</b> (CT-S. Giovanni la Punta, Castiglione)<br/> <b>Caulicellu di vigna</b> (CT-Maletto)<br/> <b>Cauricellu</b> (CT- Bronte, Randazzo)<br/> <b>Cavuliceddu</b> (CT-S. Venerina,)<br/> <b>Coliceddu</b> (CT-Linguaglossa)<br/> <b>Coluceddu</b> (CT-Adrano)</p>                                                                                                                                                                                                                                                                                                                                                                                                                                                                                                                                                                                                                                                                                                                                                                                                                                                                                                                                     |

|                                                                                                 |                                                                                                                                                                                                                                                                                                                                                                                                                                                                                                                                                                                                                                                                                     |
|-------------------------------------------------------------------------------------------------|-------------------------------------------------------------------------------------------------------------------------------------------------------------------------------------------------------------------------------------------------------------------------------------------------------------------------------------------------------------------------------------------------------------------------------------------------------------------------------------------------------------------------------------------------------------------------------------------------------------------------------------------------------------------------------------|
|                                                                                                 | <p><b>Coricellu</b> (CT-Bronte)<br/> <b>Qualiceddu</b> (S.Venerina, Zafferana, Milo)<br/> <b>Quaricellu</b> (CT-Maletto, Bronte)<br/> <b>Rapuddi</b> (ME-Isole Eolie)</p>                                                                                                                                                                                                                                                                                                                                                                                                                                                                                                           |
| <p><i>Brassica nigra</i> (L.) Koch<br/> (<i>Brassicaceae</i>)</p>                               | <p><b>Cavuliceddu niuru, Qualeddu</b> (AG-Casteltermini)<br/> <b>Lassani</b> (AG-Cianciana)<br/> <b>Mazzaredda amara</b> (CL-Caltanissetta)<br/> <b>Mazzareddi</b> (AG-Montevago)<br/> <b>Qualedda</b> (CT-Giarre); (TP-Castelvetrano, Partanna)<br/> <b>Senapa</b> (TP-Poggio Reale, Salaparuta)<br/> <b>Sinàpi</b> (ME-Mistretta, Messina), (TP-Busetto Palizzolo, Castellammare del Golfo, Custonaci, San Vito lo Capo, Valderice, Trapani)<br/> <b>Sinapu</b> (CL-Butera, Riesi)</p>                                                                                                                                                                                            |
| <p><i>Brassica rapa</i> L. subsp. <i>sylvestris</i> (L.) Janchen<br/> (<i>Brassicaceae</i>)</p> | <p><b>Alassanu sarbaggiu</b> (AG-Aragona, Realmonte)<br/> <b>Cavulazzi, Scieuriddi, Alassanu sarbaggiu, Cavuliceddru amaru</b> (AG-Campobello di Licata, Canicattì, Ravanusa); (ME-Messina)<br/> <b>Cavuledda</b> (AG-Sambuca di Sicilia)<br/> <b>Cavuliceddi</b> (TP-Calatafimi, Gibellina, Salemi, Vita)<br/> <b>Cavuliceddu amaru</b> (AG-Montallegro), (CT-Catania, Acireale); (CL-Caltanissetta, Serradifalco, S.Cataldo)<br/> <b>Cavuliceddu</b> (TP-Erice, Riserva dello Zingaro)<br/> <b>Mazzarreddi, Spicuna sarbaggia</b> (AG-Sant'Angelo Muxaro, San Biagio Platani)<br/> <b>Qualeddu</b> (TP-Erice)<br/> <b>Spicuni, Assani</b> (AG-Burgio, Lucca Sicula, Ravanusa)</p> |
| <p><i>Brassica tournefortii</i> Gouan<br/> (<i>Brassicaceae</i>)</p>                            | <p><b>Musuluchi</b> (TP)</p>                                                                                                                                                                                                                                                                                                                                                                                                                                                                                                                                                                                                                                                        |
| <p><i>Bunias erucago</i> L.<br/> (<i>Brassicaceae</i>)</p>                                      | <p><b>Catanziculi</b> (CT-Regaina)<br/> <b>Cicoina</b> (CT-Maletto, Bronte)<br/> <b>Cicoina sarbaggia</b> (CT-Adrano)<br/> <b>Ciconia</b> (CT-Nicolosi, Pedara)<br/> <b>Ciconia di vigna</b> (CT-Milo, Giarre, Venerina),<br/> <b>Erba stidda</b> (CT-Maletto).<br/> <b>Cicoira, Mazzarelli</b> (CT-Randazzo)<br/> <b>Spinacia</b> (CT-Zafferana, Linguaglossa,)<br/> <b>Spinacia sarvaggia</b> (CT-Castiglione)<br/> <b>Triuliddi</b> (CT-Belpasso)</p>                                                                                                                                                                                                                            |
| <p><i>Calamintha nepeta</i> (L.) Savi<br/> (<i>Lamiaceae</i>)</p>                               | <p><b>Amintastru</b> (AG-Sant'Angelo Muxaro, San Biagio Platani)<br/> <b>Menta</b> (AG-Licata); (CL-Butera)<br/> <b>Nieputa, Nieputedda</b> (Me-Isole Eolie)<br/> <b>Nipitedda</b> (AG-Bisaquino, Aragona, Burgio, Cammarata, Casteltermini, Cianciana, Lucca Sicula, Ravanusa); (PA-Geraci Siculo, Giardinello, Grisi)<br/> <b>Niputedda</b> (RG-Vittoria); (SR-Pachino); (TP-Riserva dello Zingaro)</p>                                                                                                                                                                                                                                                                           |
| <p><i>Capparis ovata</i> Desf.<br/> (<i>Capparidaceae</i>)</p>                                  | <p><b>Cappero</b> (CL-Caltanissetta, Delia)<br/> <b>Cappiru</b> (RG-Vittoria)<br/> <b>Chiapparu sarbaggiu</b> (AG-Raffadali)<br/> <b>Chiappara</b> (AG-Favara, Raffadali)<br/> <b>Chiappara sarbaggiu</b> (Raffadali)<br/> <b>Chiappara sarvaggia, Chiapparedda liscia</b> (CL-Butera, Riesi)<br/> <b>Chiapparedda</b> (CL-Campofranco, Sutera)<br/> <b>Chiappari</b> (AG-Aragona, Cattolica Eraclea, Realmonte)<br/> <b>Chiappira</b> (ME-Tusa)<br/> <b>Ciapparedda</b> (AG-Licata, Campofranco); (CL-Sutera)<br/> <b>Riappari</b> (AG-Montevago)</p>                                                                                                                              |
| <p><i>Capparis spinosa</i> L.<br/> (<i>Capparidaceae</i>)</p>                                   | <p><b>Cappero</b> (TP-Riserva dello Zingaro); (ME-Isole Eolie)<br/> <b>Chiappaira</b> (PA-Caccamo)<br/> <b>Chiappara</b> (ME-Galati Mamertino); (AG-Sambuca Di Sicilia); (TP-Pantelleria); (CT-Giarre, S. Giovanni la Punta); (CL-Caltanissetta); (PA-Partinico, Vicari, Villafrati);</p>                                                                                                                                                                                                                                                                                                                                                                                           |

|                                                                                                  |                                                                                                                                                                                                                                                                                                                                                                                                                                                                                                                                                                                                                                                                               |
|--------------------------------------------------------------------------------------------------|-------------------------------------------------------------------------------------------------------------------------------------------------------------------------------------------------------------------------------------------------------------------------------------------------------------------------------------------------------------------------------------------------------------------------------------------------------------------------------------------------------------------------------------------------------------------------------------------------------------------------------------------------------------------------------|
|                                                                                                  | (TP-Castellammare del Golfo, Castelvetro, Custonaci, Favignana, Levanzo, Marettimo, Mazara del Vallo, Partanna, Poggio Reale, Salaparuta, San Vito lo Capo, Valderice, Riserva dello Zingaro)<br><b>Chiappare</b> (CT-Santa Venerina, Zafferana)<br><b>Chiappari</b> (TP-Favignana, Levanzo, Marettimo)<br><b>Chiapparina</b> (AG-Realmonte); (CT-Nicolosi)<br><b>Chiapparo</b> (PA-Ustica)<br><b>Chiapparù</b> (CT-Adrano, Biancavilla, Bronte, Santa Venerina, Zafferana)<br><b>Chiapparù manzu</b> (AG-Raffadali)<br><b>Chiappiru</b> (CT-Castiglione)<br><b>Chiappuli</b> (CT-Linguaglossa)<br><b>Ciàppiru</b> (TP-Riserva dello Zingaro)<br><b>Riappari</b> (SR-Pachino) |
| <i>Carduncellus pinnatus</i> (Desf.) DC.<br>( <i>Asteraceae</i> )                                | <b>Carduncellu</b> PA (Petalia Soprana, Petralia sottana)                                                                                                                                                                                                                                                                                                                                                                                                                                                                                                                                                                                                                     |
| <i>Cardus argyrea</i> Biv.<br>( <i>Asteraceae</i> )                                              | <b>Napordi d'acqua</b> (AG-Sant'Angelo Muxaro)                                                                                                                                                                                                                                                                                                                                                                                                                                                                                                                                                                                                                                |
| <i>Cardus pycnocephalus</i> L.<br>( <i>Asteraceae</i> )                                          | <b>Scoddi</b> (EN-Piazza Armerina)                                                                                                                                                                                                                                                                                                                                                                                                                                                                                                                                                                                                                                            |
| <i>Carlina sicula</i> Ten.<br>( <i>Asteraceae</i> )                                              |                                                                                                                                                                                                                                                                                                                                                                                                                                                                                                                                                                                                                                                                               |
| <i>Carthamus lanatus</i> L.<br>( <i>Asteraceae</i> )                                             | <b>Vavanazzi</b> (AG-Sambuca Di Sicilia)                                                                                                                                                                                                                                                                                                                                                                                                                                                                                                                                                                                                                                      |
| <i>Castanea sativa</i> Miller<br>( <i>Fagaceae</i> )                                             | <b>Castagnera</b> (ME-Galati Mamertino, Tortorici)<br><b>Castagna</b> (PA)                                                                                                                                                                                                                                                                                                                                                                                                                                                                                                                                                                                                    |
| <i>Celtis australis</i> L.<br>( <i>Ulmaceae</i> )                                                | <b>Caccamo</b> (PA-Castronovo)<br><b>Milicuccu</b> (CT-Bronte)<br><b>Milikukku</b> (RG-Vittoria)                                                                                                                                                                                                                                                                                                                                                                                                                                                                                                                                                                              |
| <i>Centaurea calcitrapa</i> L.<br>( <i>Asteraceae</i> )                                          | <b>Aprocchiu</b> (AG-Aragona, Sant'Angelo Muxaro)<br><b>Abbrocciu</b> (AG-Licata)<br><b>Grap l'occhi</b> (EN-Piazza Armerina)<br><b>Occhi n'Cristu</b> (AG-Montallegro); (CT-Catania, Acireale)                                                                                                                                                                                                                                                                                                                                                                                                                                                                               |
| <i>Centaurea nicaensis</i> All.<br>( <i>Asteraceae</i> )                                         | <b>Approchiu</b> (AG-Aragona)                                                                                                                                                                                                                                                                                                                                                                                                                                                                                                                                                                                                                                                 |
| <i>Centaurea solstitialis</i> L. subsp. <i>schouwii</i><br>(DC.) Dostal<br>( <i>Asteraceae</i> ) | <b>Gattaredda</b> (PA-Gangi, San Mauro Castelverde)                                                                                                                                                                                                                                                                                                                                                                                                                                                                                                                                                                                                                           |
| <i>Centranthus ruber</i> L.<br>( <i>Valerianaceae</i> )                                          | <b>Pasqua rossa, Pasqua bianca</b> (SR-Noto)<br><b>Valeriana</b> (CL-Caltanissetta, San Cataldo, Serradifalco); (AG-Cattolica Eraclea, Sambuca Di Sicilia, San Biagio Platani)                                                                                                                                                                                                                                                                                                                                                                                                                                                                                                |
| <i>Ceratonion siliqua</i> L.<br>( <i>Fabaceae</i> )                                              | <b>Carruba</b> (PA-Borghetto), (TP-Custonaci, Erice, Mazara del Vallo, Pantelleria, Trapani, Valderice)<br><b>Carrubbu</b> (PA-Bisaquino); (TP-Gibellina)<br><b>Cicibanoz</b> (PA-Contessa Entellina)                                                                                                                                                                                                                                                                                                                                                                                                                                                                         |
| <i>Chamaerops humilis</i> L.<br>( <i>Palmae</i> )                                                | <b>Giummarra</b> (CL-Mazzarino, Riesi)<br><b>Safagguuni</b> (RG-Vittoria)<br><b>Scupazzu</b> (RG-Vittoria)                                                                                                                                                                                                                                                                                                                                                                                                                                                                                                                                                                    |
| <i>Chenopodium album</i> L. subsp. <i>album</i><br>( <i>Chenopodiaceae</i> )                     | <b>Erva fitenti</b> (RG-Vittoria)                                                                                                                                                                                                                                                                                                                                                                                                                                                                                                                                                                                                                                             |
| <i>Chondrilla juncea</i> L.<br>( <i>Asteraceae</i> )                                             | <b>Cud'e attu</b> (CT-Linguaglossa)<br><b>Cudidida</b> (CT-Nicolosi, Zafferana, Ragaina, Belpasso)<br><b>Curi i suggi</b> (CT-Bronte)<br><b>Curidda</b> (CT-Pedara)<br><b>Cutuledda</b> (CT-Adrano)<br><b>Cutulidda</b> (CT-S.Venerina, Zafferana, Milo, Linguaglossa)<br><b>Inestruola</b> (CT-Randazzo)<br><b>Inestruora</b> (CT-Randazzo)<br><b>Inistrora</b> (CT-Maletto)                                                                                                                                                                                                                                                                                                 |
| <i>Chrysanthemum coronarium</i> L.                                                               | <b>Ciuri di cacamaiu</b> (AG-Sant'Angelo Muxaro)                                                                                                                                                                                                                                                                                                                                                                                                                                                                                                                                                                                                                              |

|                                                                                        |                                                                                                                                                                                                                                                                                                                                                                                                                                                                                                                                                                                          |
|----------------------------------------------------------------------------------------|------------------------------------------------------------------------------------------------------------------------------------------------------------------------------------------------------------------------------------------------------------------------------------------------------------------------------------------------------------------------------------------------------------------------------------------------------------------------------------------------------------------------------------------------------------------------------------------|
| ( <i>Asteraceae</i> )                                                                  | <b>Maiazzu</b> (CL-Butera, Riesi)<br><b>Maiu</b> (AG-Licata)                                                                                                                                                                                                                                                                                                                                                                                                                                                                                                                             |
| <i>Cichorium intybus</i> L.<br>( <i>Asteraceae</i> )                                   | <b>Cicoira</b> (ME-S.Stefano di Camastra)<br><b>Cicoria</b> (AG-Burgio, Lucca Sicula, Ravanusa, Cattolica Eraclea, Comitini, Favara, Realmonte, Siculiana, Campobello di Licata, Canicattì, Raffadali, Sant'Angelo Muxaro, San Biagio Platani, Montallegro),<br>(PA-Bisaquino); (ME-Mistretta); (TP-Trapani, Erice, Custonaci); (CT-Catania, Acireale, Nicolosi)<br><b>Cicoria amara</b> (TP-Pantelleria)<br><b>Cicoria catalogna</b> (AG-Aragona, Realmonte, Montevago)<br><b>Cicoria di campagna</b> TP-Riserva dello Zingaro)<br><b>Cicoria di chianca</b> (CL-Butera, Riesi)         |
| <i>Clematis vitalba</i> L.<br>( <i>Ranunculaceae</i> )                                 | <b>Liaa</b> (ME-Tortorici), (CT-Linguaglossa, Ragaina)<br><b>Liareddi</b> (ME-Mistretta)<br><b>Ligara</b> (CT-Randazzo, Maletto, Bronte)<br><b>Mitabbi</b> (CT-Castiglione)<br><b>Mitarbi</b> (CT-Milo)<br><b>Vitalba</b> (PA-Cefalù)<br><b>Viterbi</b> (CT-Linguaglossa)                                                                                                                                                                                                                                                                                                                |
| <i>Corylus avellana</i> L.<br>( <i>Corylaceae</i> )                                    | <b>Nucidida</b> (PA-Bisaquino)                                                                                                                                                                                                                                                                                                                                                                                                                                                                                                                                                           |
| <i>Crataegus azarolus</i> L.<br>( <i>Rosaceae</i> )                                    | <b>Azaloru</b> (TP-Trapani),<br><b>Lazzarolu, Azzaloru, Lanzarolu giarnu</b> (TP-Riserva dello Zingaro)                                                                                                                                                                                                                                                                                                                                                                                                                                                                                  |
| <i>Crataegus</i> <i>monogyna</i><br>Jacq.subsp. <i>monogyna</i><br>( <i>Rosaceae</i> ) | <b>Br'zulinu</b> (EN-Piazza Armerina)<br><b>Brizzulina</b> (AG-Sambuca di Sicilia)<br><b>Brizzulino</b> (ME-Tortorici)<br><b>Bruzzellinu</b> (ME-Mistretta)<br><b>Russulina</b> (SR-Noto)<br><b>Ursuliddu</b> (AG-Campobello di Licata, Canicattì, Ravanusa, Montallegro); (CT-Catania, Acireale)<br><b>Vrizzulina, Zinzuli</b> (AG-Favara)                                                                                                                                                                                                                                              |
| <i>Crepis bursifolia</i> L.<br>( <i>Asteraceae</i> )                                   | <b>Ricuttella</b> (CT-Randazzo)<br><b>Rizzaredda</b> (CT-Ragaina)<br><b>Rizzarella</b> (CT-Maletto)                                                                                                                                                                                                                                                                                                                                                                                                                                                                                      |
| <i>Crepis vesicaria</i> L. subsp. <i>vesicaria</i><br>( <i>Asteraceae</i> )            | <b>Cicoria amara</b> (TP-Busetto Palizzolo, Favignana, Levanzo, Marettimo)<br><b>Cicoria missinisa</b> (AG-Aragona)<br><b>Cicuriuni</b> (EN-Piazza Armerina)<br><b>Erba d'acietri</b> (ME-Tusa)<br><b>Occhi pirnici</b> (ME-Santo Stefano di Camastra)                                                                                                                                                                                                                                                                                                                                   |
| <i>Crithmum maritimum</i> L.<br>( <i>Apiaceae</i> )                                    | <b>Finucchieddu di mari, Finucchieddu marinu</b> (TP-Favignana, Levanzo, Marettimo)                                                                                                                                                                                                                                                                                                                                                                                                                                                                                                      |
| <i>Cydonia oblonga</i> L.<br>( <i>Rosaceae</i> )                                       | <b>Cotogno</b> (PA-Ustica)<br><b>Cutugnu</b> (PA-Bisaquino); (ME-Caronia); (TP Erice, Gibellina, Salemi, Trapani, Vita), (AG-Sambuca di Sicilia)                                                                                                                                                                                                                                                                                                                                                                                                                                         |
| <i>Cynara cardunculus</i> L. subsp.<br><i>cardunculus</i><br>( <i>Asteraceae</i> )     | <b>Cacocciula sarbaggia</b> (AG-Raffadali)<br><b>Cacocciuliddu sarbaggiu</b> (AG-Siculiana)<br><b>Cacocciuliddu spinusu</b> (AG-Raffadali)<br><b>Cacocciulu sarbaggiu</b> (AG-Sant'Angelo Muxaro)<br><b>Cacucciuliddu</b> (AG-Licata)<br><b>Carcocciula sarvaggia</b> (PA-Bisaquino); (AG-Sambuca di Sicilia)<br><b>Carduna servaggi</b> (ME-Mistretta)<br><b>Carduni</b> (AG-Campobello di Licata, Canicattì, Ravanusa, Montallegro); (CT-Acireale, Catania)<br><b>Carduni centutesti</b> (AG-Aragona, Realmonte)<br><b>Carduni amaru, Caccucchiedda, Carduni sarvaggiu</b> (AG-Bivona) |
| <i>Diplotaxis crassifolia</i> DC.<br>( <i>Brassicaceae</i> )                           | <b>Erva cavulara, cavuliceddi</b> (AG-Sant'Angelo Muxaro, San Biagio Platani)                                                                                                                                                                                                                                                                                                                                                                                                                                                                                                            |
| <i>Diplotaxis erucoides</i> (L.)DC.<br>( <i>Brassicaceae</i> )                         | <b>Ciuri bianchi</b> (PA-Ustica)<br><b>Finacciolu</b> (AG-Licata)<br><b>Finacciuola</b> (AG-Montevago)                                                                                                                                                                                                                                                                                                                                                                                                                                                                                   |

|                                                                                                 |                                                                                                                                                                                                                                                                                                                                                                                                                                                                                                                                                                                                                                                                                                                                                                                                                                                                                                           |
|-------------------------------------------------------------------------------------------------|-----------------------------------------------------------------------------------------------------------------------------------------------------------------------------------------------------------------------------------------------------------------------------------------------------------------------------------------------------------------------------------------------------------------------------------------------------------------------------------------------------------------------------------------------------------------------------------------------------------------------------------------------------------------------------------------------------------------------------------------------------------------------------------------------------------------------------------------------------------------------------------------------------------|
|                                                                                                 | <p><b>Finacciuolu</b> (CL-Mussomeli)<br/> <b>Lariani</b> (AG-Favara, Raffadali)<br/> <b>Lassanu d'aglia</b> (PA-Prizzi)<br/> <b>Pissineddi</b> (AG-Cianciana)<br/> <b>Razzi</b> (AG-Sambuca Di Sicilia)<br/> <b>Razzina, Ruca, Sinicciola</b> (AG-Aragona, Cattolica Eraclea, Raffadali)<br/> <b>Ruca</b> (AG-Aragona)<br/> <b>Sanacciola</b> (RG-Vittoria)<br/> <b>Sanaccioli</b> (EN-Piazza Armerina)<br/> <b>Sanacciolo</b> (CL-Butera, Riesi)<br/> <b>Senàpa</b> (CL-Caltanissetta, San Cataldo, Serradifalco)<br/> <b>Sinacciola</b> (RG-Vittoria), (AG-Cattolica Eraclea, Realmonte, Sant'Angelo Muxaro, San Biagio Platani, Bivona); (CT-Nicolosi)<br/> <b>Sinacciuddu</b> (AG-Cammarata, Casteltermini)<br/> <b>Sinacciulu</b> (CL-Butera, Riesi, Mazzarino, Sommatino)</p>                                                                                                                       |
| <i>Diplotaxis tenuifolia</i> (L.) DC.<br>( <i>Brassicaceae</i> )                                | <b>Ruca</b> (CT-Giarre), (TP-Trapani, Valderice, Erice)                                                                                                                                                                                                                                                                                                                                                                                                                                                                                                                                                                                                                                                                                                                                                                                                                                                   |
| <i>Erucastrum virgatum</i> (Presl) Presl<br>( <i>Brassicaceae</i> )                             | <b>Sinapi</b> (PA-Ganci)                                                                                                                                                                                                                                                                                                                                                                                                                                                                                                                                                                                                                                                                                                                                                                                                                                                                                  |
| <i>Eryngium campestre</i> L.<br>( <i>Apiaceae</i> )                                             | <b>Insalata ru riavuliu, panicallu</b> (CL-Butera, Caltanissetta, San Cataldo, Serradifalco)<br><b>N'zalata du diavulu, N'zalata du scessu</b> (TP-Riserva dello Zingaro)<br><b>Panicaudu</b> (CL-Caltanissetta, San Cataldo, Santa Caterina Villermosa, Serradifalco)<br><b>Panicauru</b> (TP-Riserva dello Zingaro)                                                                                                                                                                                                                                                                                                                                                                                                                                                                                                                                                                                     |
| <i>Fedia cornucopiae</i> (L.) Gaertner<br>( <i>Valerianaceae</i> )                              | <b>Lattucheddra ri maio</b> (ME-Mistretta)<br><b>Lattuchedda modda</b> (AG-Lampedusa)<br><b>Spazzaquartara</b> (ME-Tortorici)<br><b>Maggio</b> (ME-Galati Mamertino)<br><b>Peri ri ciocca</b> (TP-Favignana)<br><b>Peri ciocca, Ervi moddi</b> (TP-Riserva dello Zingaro)<br><b>Spezzaquartari</b> (ME-Tusa)                                                                                                                                                                                                                                                                                                                                                                                                                                                                                                                                                                                              |
| <i>Ferula communis</i> L.<br>( <i>Apiaceae</i> )                                                | <b>Fella, Ferla</b> (TP-Riserva dello Zingaro)<br><b>Ferra</b> (RG-Vittoria), (CT-Bronte)                                                                                                                                                                                                                                                                                                                                                                                                                                                                                                                                                                                                                                                                                                                                                                                                                 |
| <i>Ficus carica</i> L.<br>( <i>Moraceae</i> )                                                   | <b>Ficara</b> (ME-Tortorici)<br><b>Fichera</b> (ME-San Fratello, Santo Stefano di Camastra)<br><b>Ficu</b> (TP-Trapani), (AG-Campobello di Licata, Canicatti, Ravanusa, Realmonte, Montallegro); (CT-Acireale, Catania, Nicolosi), (ME-Isole Eolie)<br><b>Ticchiara, Ficu</b> (AG-San Biagio Platani, Sant'Angelo Muxaro); (ME-Galati Mamertino, Longi, Mirto, Mistretta, Naso)                                                                                                                                                                                                                                                                                                                                                                                                                                                                                                                           |
| <i>Foeniculum</i> <i>vulgare</i> Miller subsp. <i>piperitum</i> Coutinho<br>( <i>Apiaceae</i> ) | <b>Finucchieddru silvaticu</b> (TP)                                                                                                                                                                                                                                                                                                                                                                                                                                                                                                                                                                                                                                                                                                                                                                                                                                                                       |
| <i>Foeniculum vulgare</i> Miller subsp. <i>vulgare</i><br>( <i>Apiaceae</i> )                   | <b>Finichieddu sarbaggiu</b> (AG-Comitini, Favara, Raffadali, Siculiana)<br><b>Finocchi</b> (ME-Mistretta)<br><b>Finocchiu</b> (AG-Realmonte, Sambuca di Sicilia); (CT-Nicolosi); (ME-Galati Mamertino, Longi, Tortorici, Isole Eolie)<br><b>Finocchiu di campagna</b> (AG-Burgio, Lucca Sicula, Ravanusa, Montevago)<br><b>Finocchiu duci</b> (AG-Raffadali)<br><b>Finocchiu 'ngranatu</b> (AG-Canicatti)<br><b>Finocchiu sarbaggiu</b> (AG-Raffadali, Sant'Angelo Muxaro, San Biagio Platani, Bivona, Casteltermini Cianciana)<br><b>Finocchiu sarvaggiu</b> (TP-Pantelleria, Trapani, Erice, Custonaci)<br><b>Finocciu</b> (ME-San Fratello)<br><b>Finucchieddu</b> (AG-Isole Pelagie)<br><b>Finucchieddu di giru</b> (AG-Aragona, Raffadali, Realmonte)<br><b>Finucchieddu sarbaggiu, Finucchieddru rizzu</b> (AG-Raffadali)<br><b>Finucchieddu rizzu, Finocchieddu i timpa</b> (CT-Adrano, Belpasso, |

|                                                                                                  |                                                                                                                                                                                                                                                                                                                                                                                                                                                                                                                                                                                                          |
|--------------------------------------------------------------------------------------------------|----------------------------------------------------------------------------------------------------------------------------------------------------------------------------------------------------------------------------------------------------------------------------------------------------------------------------------------------------------------------------------------------------------------------------------------------------------------------------------------------------------------------------------------------------------------------------------------------------------|
|                                                                                                  | Biancavilla Bronte, Castiglione, Linguaglossa, Maletto, Milo, Nicolosi, Pedara, Ragaina, Randazzo, S.Giovanni la Punta, S.Venerina, Zafferana)<br><b>Finucchieddu sarvaggiu</b> (CT-Giarre)<br><b>Finuccieddu sarvaggiu</b> (AG-Licata)<br><b>Finuccieddu rizzu</b> (AG-Licata)                                                                                                                                                                                                                                                                                                                          |
| <i>Fraxinus ornus</i> L.<br>( <i>Oleaceae</i> )                                                  | <b>Manna</b> (PA-Castelbuono)                                                                                                                                                                                                                                                                                                                                                                                                                                                                                                                                                                            |
| <i>Glycyrrhiza glabra</i> L.<br>( <i>Fabaceae</i> )                                              | <b>Niculizia</b> (AG-Aragona, Cattolica Eraclea, Licata, Sambuca di Sicilia, Sant'Angelo Muxaro, San Biagio Platani)<br><b>Nigulizia</b> (AG-Casteltermini, Cianciana)<br><b>Niquirizia</b> (AG-Montevago)                                                                                                                                                                                                                                                                                                                                                                                               |
| <i>Hedysarum coronarium</i> L.<br>( <i>Fabaceae</i> )                                            | <b>Sudda</b> (AG-Aragona, Sant'Angelo Muxaro, San Biagio Platani, Calatafimi, Campobello di Mazara, Salemi, Vita, Custonaci)<br><b>Suddra</b> (CL-Campofranco, Sutera, Comitini, Bivona)                                                                                                                                                                                                                                                                                                                                                                                                                 |
| <i>Helicrysum italicum</i> (Roth) Don<br>( <i>Asteraceae</i> )                                   | <b>Rosamarina sarvaggia mascolina</b> (AG-Sant'Angelo Muxaro)                                                                                                                                                                                                                                                                                                                                                                                                                                                                                                                                            |
| <i>Hermodactylis tuberosus</i> (L.) Salish.<br>( <i>Iridaceae</i> )                              | <b>Buttuni di iaddu</b> , (CT-Linguaglossa, Castiglione)<br><b>Cantaliaddi, Cantajaddu, Canta addu</b> (CT-Ragaina)<br><b>Castagnotto</b> (CT-Randazzo)<br><b>Cricch'èaddu</b> (CT-Milo)<br><b>Pizzicaladdi</b> (CT-Zafferana)<br><b>Sucameli</b> (CT-Linguaglossa)                                                                                                                                                                                                                                                                                                                                      |
| <i>Hirschfeldia incana</i> (L.) Lagr.F.<br>( <i>Brassicaceae</i> )                               | <b>Assini biancu</b> (PA-Ganci)<br><b>Sanapieddu duci</b> (CL-Butera, Riesi)                                                                                                                                                                                                                                                                                                                                                                                                                                                                                                                             |
| <i>Hyoseris radiata</i> L.<br>( <i>Asteraceae</i> )                                              | <b>Attalebbra</b> (TP-Riserva dello Zingaro)<br><b>Buttuni ri gallo</b> (CT-Randazzo)<br><b>Cardeddi di serpi</b> (TP-Favignana, Levanzo, Marettimo)<br><b>Cicuriuni</b> (AG-Casteltermini)<br><b>Cudduredda</b> (CT-Ragaina)<br><b>Cudduruni</b> (CT-Ragaina)<br><b>Erba duci</b> (CT-Linguaglossa)<br><b>Perigallu</b> (CT-Maletto)<br><b>Pidicudda</b> (PA-Bisaquino)<br><b>Tarassaco</b> (TP-Campobello di Mazara)                                                                                                                                                                                   |
| <i>Hypochoeris cretensis</i> (L.) Chaub.et Bory<br>( <i>Asteraceae</i> )                         | <b>Citula duci</b> (PA-Vicari)                                                                                                                                                                                                                                                                                                                                                                                                                                                                                                                                                                           |
| <i>Hypochoeris laevigata</i> L.<br>( <i>Asteraceae</i> )                                         | <b>Razza</b> (ME-Tortorici)                                                                                                                                                                                                                                                                                                                                                                                                                                                                                                                                                                              |
| <i>Hypochoeris radicata</i> L.<br>( <i>Asteraceae</i> )                                          | <b>Coscì vecchia</b> (CT-Nicolosi, S. Giovanni la Punta, Pedara, S.Venerina, Zafferana, Milo, Linguaglossa, Adrano, Biancavilla, Ragaina)<br><b>Coscia vecchia</b> (CT-Belpasso)<br><b>Costi vecchia</b> (CT-Castiglione, Randazzo, Maletto, Bronte)<br><b>Costa ri vecchia</b> (CT-Randazzo)<br><b>Costavecchia</b> (CT-Bronte)<br><b>Cucummareddu</b> (CT-Ragaina Nicolosi)<br><b>Erva rassudda</b> (PA-Partitico)<br><b>Micci scalora</b> (CT-Linguaglossa)<br><b>Scaranzinzuli, Cazzicatummulì</b> (CT-Zafferana)<br><b>Scarla</b> (PA-Gangi, San Mauro Castelverde)<br><b>Scarri</b> (ME-Mistretta) |
| <i>Hypochoeris radicata</i> L.<br>subsp. <i>neapolitana</i> (DC.) Guad.<br>( <i>Asteraceae</i> ) | <b>Cosci vecchia</b> (CT-Nicolosi, S. Giovanni la Punta, Pedara, S.Venerina, Zafferana, Milo, Linguaglossa, Adrano, Biancavilla, Ragaina)<br><b>Cosciavecchia</b> (CT-Belpasso)<br><b>Costi vecchia</b> (CT-Castiglione, Maletto, Bronte; ME-Tortorici)<br><b>Costa ri vecchia</b> (CT-Bronte)<br><b>Costavecchia</b> (CT-Bronte)<br><b>Scarri</b> (ME-Mistretta)                                                                                                                                                                                                                                        |



|                                                             |                                                                                                                                                                                                                                                                                                                                                                                                                                                                                                                                                                                                                                                                                                                                                                                                                                                     |
|-------------------------------------------------------------|-----------------------------------------------------------------------------------------------------------------------------------------------------------------------------------------------------------------------------------------------------------------------------------------------------------------------------------------------------------------------------------------------------------------------------------------------------------------------------------------------------------------------------------------------------------------------------------------------------------------------------------------------------------------------------------------------------------------------------------------------------------------------------------------------------------------------------------------------------|
| <i>Juncus acutus</i> L.<br>( <i>Juncaceae</i> )             | <b>Iuncu</b> (AG)                                                                                                                                                                                                                                                                                                                                                                                                                                                                                                                                                                                                                                                                                                                                                                                                                                   |
| <i>Lactuca serriola</i> L.<br>( <i>Asteraceae</i> )         | <b>Lattuca sarbaggia</b> (CT-Bronte)                                                                                                                                                                                                                                                                                                                                                                                                                                                                                                                                                                                                                                                                                                                                                                                                                |
| <i>Lactuca viminea</i> (L.) Presl.<br>( <i>Asteraceae</i> ) | <b>Cacciacunigghia</b> (CT-Milo)<br><b>Caccialepri, pirnici amara</b> (CT-Linguaglossa)<br><b>Caranzicula</b> (CT-Zafferana)<br><b>Cardedda di pietra</b> (CT-Castiglione)<br><b>Ervascursuni</b> (CT-S. Giovanni la Punta)<br><b>Evva di scursuni</b> (CT-Nicolosi)<br><b>Evva di scussuni</b> (CT-Belpasso)<br><b>Evvascursuni</b> (CT-Nicolosi)<br><b>Gattaru</b> (CT-Bronte)<br><b>Lattughedda du signori</b> (CT-Adrano)<br><b>Ntossicaceddi</b> (CT-Biancavilla, Ragaina)<br><b>Pieririnigghiu</b> (CT-Randazzo)<br><b>Perinigghiu</b> (CT-Randazzo, Bronte)<br><b>Pisciacunigghia</b> (CT- Milo, S. Venerina,)<br><b>Scursunara</b> (CT-Pedara, Ragaina)<br><b>Virinella</b> (CT-Maletto)                                                                                                                                                    |
| <i>Lamium flexuosum</i> Ten.<br>( <i>Lamiaceae</i> )        | <b>N'zinzili</b> (ME-Galati Mamertino, San Marco d' Alunzio)                                                                                                                                                                                                                                                                                                                                                                                                                                                                                                                                                                                                                                                                                                                                                                                        |
| <i>Lathyrus articulatus</i> L.<br>( <i>Fabaceae</i> )       | <b>Fajoru</b> (CT-Randazzo)<br><b>Fasola</b> (CT-Adrano)<br><b>Fasoli</b> (CT-Ragaina)<br><b>Fasuledda</b> (CT-Belpasso)<br><b>Fasuledda sarbaggia</b> (CT-Nicolosi)<br><b>Pusedda sabbaggia</b> (CT-Castiglione)<br><b>Puseddu sarbaggiu</b> (CT-Bronte)<br><b>Vizza</b> (CT-Santa Venerina, Zafferana , Maletto)                                                                                                                                                                                                                                                                                                                                                                                                                                                                                                                                  |
| <i>Lathyrus clymenum</i> L.<br>( <i>Fabaceae</i> )          | <b>Piseddu sarbaggiu</b> (AG-Sambuca Di Sicilia)                                                                                                                                                                                                                                                                                                                                                                                                                                                                                                                                                                                                                                                                                                                                                                                                    |
| <i>Lathyrus ochrus</i> (L.)DC.<br>( <i>Fabaceae</i> )       | <b>Piseddu sarbaggiu</b> (AG-Raffadali),<br><b>Fasolu sarbaggiu</b> (AG-Sant'Angelo Muxaro)                                                                                                                                                                                                                                                                                                                                                                                                                                                                                                                                                                                                                                                                                                                                                         |
| <i>Lathyrus odoratus</i> L.<br>( <i>Fabaceae</i> )          | <b>Fasolu sarbaggiu</b> (AG-Sant'Angelo Muxaro)<br><b>Piseddu sarbaggiu</b> (AG-Aragona, Raffadali)<br><b>Pisidduzzu sarvaggiu</b> (PA-Partinico)                                                                                                                                                                                                                                                                                                                                                                                                                                                                                                                                                                                                                                                                                                   |
| <i>Lathyrus sylvestris</i> L.<br>( <i>Fabaceae</i> )        | <b>Cessavuoi</b> (ME-Santo Stefano di Camastra)<br><b>Gelsaù</b> (ME-Mistretta)                                                                                                                                                                                                                                                                                                                                                                                                                                                                                                                                                                                                                                                                                                                                                                     |
| <i>Laurus nobilis</i> L.<br>( <i>Lauraceae</i> )            | <b>Addagaru</b> (ME-Raffadali, Sant'Angelo Muxaro, San Biagio Platani, Siculiana, Montevago)<br><b>Addaura</b> (PA-Palermo)<br><b>Addauro</b> (CL-Caltanissetta, Delia)<br><b>Addauro</b> (AG-Aragona, Realmonte); (ME- Mistretta, San Marco di Alunzio, Isole Eolie); (RG-Vittoria); (PA- Ustica); (TP-Busetto Palizzolo, Calatafimi, Castellammare del Golfo, Custonaci, Erice, Favignana, Levanzo, Marettimo, Mazara del Vallo, San Vito lo Capo, Valderice, Riserva dello Zingaro)<br><b>Addavuru</b> (PA-Bisaquino); (TP-Gibellina, Salemi, Vita); (AG-Sambuca di Sicilia)<br><b>Addrauru</b> (AG-Campobello di Licata, Canicattì, Ravanusa, Realmonte, Montallegro); ( TP-Mazara del Vallo); (CT- Catania, Acireale, Nicolosi)<br><b>Dadàr</b> (ME-San Fratello)<br><b>Dàuru</b> (EN-Piazza Armerina); (ME-Galati Mamertino, Tortorici, Naso) |
| <i>Lavatera trimestris</i> L.<br>( <i>Malvaceae</i> )       | <b>Marba, Bianca russina</b> (AG-Comitini, Favara, San Biagio Platani)                                                                                                                                                                                                                                                                                                                                                                                                                                                                                                                                                                                                                                                                                                                                                                              |
| <i>Leontodon tuberosus</i> L.<br>( <i>Asteraceae</i> )      | <b>Occhiu di pinnici</b> (CT-Castiglione)<br><b>Occhi pinnici</b> (CT-Randazzo)<br><b>Lattughedda</b> (CT-Ragaina)                                                                                                                                                                                                                                                                                                                                                                                                                                                                                                                                                                                                                                                                                                                                  |

|                                                                                                |                                                                                                                                                                                                                                                                                                                                                    |
|------------------------------------------------------------------------------------------------|----------------------------------------------------------------------------------------------------------------------------------------------------------------------------------------------------------------------------------------------------------------------------------------------------------------------------------------------------|
| <i>Leopoldia comosa</i> (L.) Parl.<br>( <i>Liliaceae</i> )                                     | <b>Agghioru niuru</b> (CT-Randazzo)<br><b>Cipuddazza</b> (CT-Biancavilla, Regaina)<br><b>Cipuddazzu</b> (CT-Adrano, Maletto Ragaina)<br><b>Cipuddruzza, Trubittuni</b> (CL-Caltanissetta, San Cataldo, Serradifalco)<br><b>Cipudduzza sarvaggia</b> (ME-Salina)<br><b>Cipudduzzu</b> (CT-Nicolosi, Milo, Adrano)<br><b>Purrazzu</b> (CT-Zafferana) |
| <i>Lycium europaeum</i> L.<br>( <i>Solanaceae</i> )                                            | <b>Spina santa</b> (AG-Aragona, Comitini, Licata, Raffadali, Realmonte, Siciliana);<br>(EN-Piazza Armerina)<br><b>Spinasanta</b> (PA-Ganci)                                                                                                                                                                                                        |
| <i>Lupinus albus</i> L.<br>( <i>Fabaceae</i> )                                                 | <b>Luppini</b> (ME-Mistretta, Isole Eolie)                                                                                                                                                                                                                                                                                                         |
| <i>Malva nicaensis</i> All.<br>( <i>Malvaceae</i> )                                            | <b>Marba</b> (AG-Lucca Sicula)<br><b>marva</b> (EN-Piazza Armerina)                                                                                                                                                                                                                                                                                |
| <i>Malva sylvestris</i> L.<br>( <i>Malvaceae</i> )                                             | <b>Marba</b> (CT-Zafferana, Milo, Linguagloss, Ragaina)<br><b>Marva</b> (CT-Nicolosi, S. Giovanni la Punta, Castiglione, Randazzo, Maletto, Biancavilla, Regaina)<br><b>Mavva</b> (CT-Nicolosi, Pedara, Zafferana, Adrano, Belpasso)<br><b>Mavvascu</b> (CT-Bronte)                                                                                |
| <i>Mentha aquatica</i> L.<br>( <i>Lamiaceae</i> )                                              | <b>Amenta</b> (PA-Ganci)                                                                                                                                                                                                                                                                                                                           |
| <i>Mentha pulegium</i> L.<br>( <i>Lamiaceae</i> )                                              | <b>Amenta</b> (Me-Alicudi, Filicudi, Lipari)<br><b>Menta</b> (ME- Panarea, Salina, Stromboli, Vulcano)                                                                                                                                                                                                                                             |
| <i>Mentha spicata</i> L. subsp. <i>glabrata</i> (Lej et Court.) Lebeau<br>( <i>Lamiaceae</i> ) | <b>Menta</b> (CT-Acireale)                                                                                                                                                                                                                                                                                                                         |
| <i>Mentha spicata</i> L. subsp. <i>spicata</i><br>( <i>Lamiaceae</i> )                         | <b>Amentastru, Scordiu, Rintuzza, Menta</b> (CT-Acireale); (PA-Bisaquino); (TP-Castellammare del Golfo, Mazara Del Vallo, Partanna Poggioreale)                                                                                                                                                                                                    |
| <i>Mentha suaveolens</i> Ehrh.<br>( <i>Lamiaceae</i> )                                         | <b>Amenta</b> (AG-Campofranco)<br><b>Amenta sarvaggia</b> (AG-Casteltermini)<br><b>Amintastru</b> (AG-Cattolica Eraclea, Casteltermini)<br><b>Mintastru</b> (AG-Sambuca di Sicilia, Montallegro); (CT-Catania Acireale)                                                                                                                            |
| <i>Mespilus germanica</i> L.<br>( <i>Rosaceae</i> )                                            | <b>Nespula d'invernu</b>                                                                                                                                                                                                                                                                                                                           |
| <i>Morus alba</i> L.<br>( <i>Moraceae</i> )                                                    | <b>Ceusa bianca</b> (TP-Pantelleria)<br><b>Ceusi</b> (PA-Ustica)<br><b>Ceuso bianco</b> (SR-Noto)<br><b>Ceusu biancu</b> (TP-Erice, Mazara del Vallo)                                                                                                                                                                                              |
| <i>Morus nigra</i> L.<br>( <i>Moraceae</i> )                                                   | <b>Ceusa nivura</b> (TP-Pantelleria)<br><b>Ceuso nero</b> (SR-Noto)<br><b>Ceuso nivuru</b> (TP-Mazara del vallo)<br><b>Ceusu niuru</b> (TP-Erice, Custonaci)<br><b>Cevusi</b> (PA-Ustica)                                                                                                                                                          |
| <i>Moricandia arvensis</i> (L.)DC.<br>( <i>Brassicaceae</i> )                                  | <b>Cavulu sarvaggiu</b> (AG-Sant'Angelo Muxaro),                                                                                                                                                                                                                                                                                                   |
| <i>Narcissus tazetta</i> L. subsp. <i>tazetta</i><br>( <i>Amaryllidaceae</i> )                 | <b>Agghi porri</b> (TP-Calatafimi)                                                                                                                                                                                                                                                                                                                 |
| <i>Myrtus communis</i> L.<br>( <i>Myrtaceae</i> )                                              | <b>Mirtu, Murtidda</b> (PA-Borgetto, Caccamo, Camporeale, Polizzi Generosa, San Giuseppe Jato); (SR-Pachino)<br><b>Murtitra</b> (ME-Caronia, Messina, Tusa)                                                                                                                                                                                        |
| <i>Nasturtium officinale</i> (R.)Br.<br>( <i>Brassicaceae</i> )                                | <b>Crisciuna</b> (ME-Mistretta)<br><b>Crisciuni</b> (ME-Butera, Mazzarino, Riesi, Sommatino, Bronte, Corleone, San Giuseppe Jato)<br><b>Scavuni</b> (AG-Sambuca di Sicilia)<br><b>U' crisciuni</b> (PA-Castelbuono)                                                                                                                                |
| <i>Notobasis syriaca</i> (L.) Cass.<br>( <i>Asteraceae</i> )                                   | <b>Piscialasinu</b> (AG-Sant'Angelo Muxaro, Campofranco); (PA-Prizzi)<br><b>Lamanna</b> (PA-Collesano)                                                                                                                                                                                                                                             |

|                                                       |                                                                                                                                                                                                                                                                                                                                                                                                                                                                                                                                                                                                                                                                                                                                                                                                                                                                                                                                                                                                                                                                                                                                                                                      |
|-------------------------------------------------------|--------------------------------------------------------------------------------------------------------------------------------------------------------------------------------------------------------------------------------------------------------------------------------------------------------------------------------------------------------------------------------------------------------------------------------------------------------------------------------------------------------------------------------------------------------------------------------------------------------------------------------------------------------------------------------------------------------------------------------------------------------------------------------------------------------------------------------------------------------------------------------------------------------------------------------------------------------------------------------------------------------------------------------------------------------------------------------------------------------------------------------------------------------------------------------------|
| <i>Onopordum horridum</i> Viv.<br>(Asteraceae)        | <b>Napordu</b> (TP-Riserva dello Zingaro)                                                                                                                                                                                                                                                                                                                                                                                                                                                                                                                                                                                                                                                                                                                                                                                                                                                                                                                                                                                                                                                                                                                                            |
| <i>Onopordum illyricum</i> L.<br>(Asteraceae)         | <b>Caccocciulidda sarvaggia</b> (PA-Montelepre)<br><b>Cardu anapordu</b> (PA-Collesano)<br><b>Muini</b> (CT-Castiglione)<br><b>Munaceddi</b> (AG-Bivona, Cammarata)<br><b>Munaceddu</b> (CT-Randazzo)<br><b>Munacheddu</b> (PA-Castonovo)<br><b>Muni</b> (CT-Linguaglossa)<br><b>Napordu</b> (AG-Sant'Angelo Muxaro, San Biagio Platani)<br><b>Napuordo</b> (SR-Avola, Noto)<br><b>Napuordu</b> (CL-Campofranco, Riesi, Sutera)<br><b>Napurda</b> (PA-Petralia Soprana, Petralia Sottana, Polizzi generosa, Pollina, San Mauro Castelverde)<br><b>Napurdu</b> (PA-Gangi)<br><b>Piddonicu</b> (CT-Maletto)<br><b>Scaddallasinu</b> (CT-Milo)<br><b>Trimazzi</b> (CT-Nicolosi)<br><b>Trummazzi</b> (CT-Ragaina)<br><b>Zanuri</b> (EN-Piazza Armerina)                                                                                                                                                                                                                                                                                                                                                                                                                                  |
| <i>Opuntia ficus indica</i> (L.)Miller<br>(Cactaceae) | <b>Ficalinni</b> (ME-Filicudi, Lipari, Panarea, Salina, Stomboli, Vulcano)<br><b>Fico d'India</b> (CL-Caltanissetta, Delia)<br><b>Ficodindia</b> (PA-Polizzi Generosa)<br><b>Ficubala</b> (TP-Calatafimi)<br><b>Ficudinia</b> (PA-Bisaquino); (AG-Campobello di Licata, Burgio, Lucca Sicula, Montallegro); (CT-Catania, Acireale); (PA-Ganci, Castellammare Del Golfo, Mazara Del Vallo, Partanna, Poggioreale)<br><b>Ficudinna</b> (CL-Butera Riesi)<br><b>Ficudinni</b> (AG-Montevago)<br><b>Ficudinnia</b> (AG-Aragona, Realmonte)<br><b>Ficulinia</b> (AG-Sambuca Di Sicilia)<br><b>Ficumori</b> (TP-Riserva dello Zingaro)<br><b>Ficurigna</b> (Caccamo, (TP-Favignana, Levanzo, Marettimo, Riserva dello Zingaro)<br><b>Ficurini</b> (TP-Busetto Palizzolo)<br><b>Ficurinia</b> (TP-Partitico, San Cipirello, Gibelina, Salemi, Vita)<br><b>Ficurinii</b> (TP-Favignana, Levanzo, Marettimo)<br><b>Ficurinnia</b> (TP-Campobello di Mazara, Mazara del Vallo, Riserva dello Zingaro)<br><b>Ficurinnia, ficadinniera</b> (ME-Galati Mamertino, Longi, S.Agata di Militello, Santo Stefano di Camastra, Tortorici)<br><b>Fikupali</b> (RG-Vittoria); (TP-Riserva dello Zingaro) |
| <i>Origanum heracleoticum</i> L.<br>(Lamiaceae)       | <b>Ariànu</b> (AG-Aragona, Realmonte, Montevago); (CT-Giarre); (CL-Mussomeli); (TP- Erice Castelvetrano, Favignana, Marittimo, Mazara del Vallo, Partanna, Poggio Reale, Salaparuta, Riserva dello Zingaro)<br><b>Arifinu</b> (RG-Vittoria)<br><b>Ariganu</b> (PA-Chiusa Sclafani, Petralia Soprana, Petralia Sottana); (AG- Bugio, Licata, Raffadali, Sant'Angelo Muxaro, San Biagio Platani, Ravanusa)<br><b>Arriano</b> (PA-Palazzo Adriano , Castronovo); (TP- Favignana)<br><b>Arriano</b> (PA-Borghetto, Corleone, Roccamena, S. Giuseppe Jato)<br><b>Origanu</b> (CL-Caltanissetta, Delia)<br><b>Origanu</b> (CL-Campofranco, Sutera)<br><b>Reniu</b> (PA-Caccamo)<br><b>Rianu</b> (AG-Aragona, Favara, Realmonte, Menfi)<br><b>Rianu</b> (PA-Galati Mamertino, Longi, Castelbuono)<br><b>Rienu</b> (ME-Mistretta)<br><b>Rigane</b> (PA-Piana degli Albanesi)<br><b>Riganu</b> (CL-Caltanissetta, San Cataldo, Santa Caterina Villermosa, Serradifalco); (ME- Tortorici, S. Stefano di Camastra)<br><b>Riganu sarvaggiu</b> (EN-Piazza Armerina)<br><b>Riùni</b> (PA-Collesano)                                                                                               |

|                                                                          |                                                                                                                                                                                                                                                                                                                                                                                                                                                                                                                                                                                                                                                          |
|--------------------------------------------------------------------------|----------------------------------------------------------------------------------------------------------------------------------------------------------------------------------------------------------------------------------------------------------------------------------------------------------------------------------------------------------------------------------------------------------------------------------------------------------------------------------------------------------------------------------------------------------------------------------------------------------------------------------------------------------|
| <i>Origanum majorana</i> L.<br>( <i>Lamiaceae</i> )                      | <b>Maggiarana</b> (AG-Campobello di Licata, Canicattì, Ravanusa)<br><b>Maiurana</b> (PA-Palazzo Adriano, Chiusa Sclafani), (TP-Campobello di Mazara)<br><b>Majurana</b> (AG-Montallegro); (CT-Catania, Acireale)                                                                                                                                                                                                                                                                                                                                                                                                                                         |
| <i>Origanum vulgare</i> L.<br>( <i>Lamiaceae</i> )                       | <b>Rianu</b> (PA-Ustica)<br><b>Ricunu</b> (SR-Pachino)                                                                                                                                                                                                                                                                                                                                                                                                                                                                                                                                                                                                   |
| <i>Oryzopsis miliacea</i> (L.) Ash.et Schweinf<br>( <i>Poaceae</i> )     | <b>Fiurbugliuni</b> (AG-Licata)                                                                                                                                                                                                                                                                                                                                                                                                                                                                                                                                                                                                                          |
| <i>Oxalis pes-caprae</i> L.<br>( <i>Oxalidaceae</i> )                    | <b>Agari duci</b> (PA-Castronovo)<br><b>Agra e duci, Caracitula</b> (AG-Raffadali)<br><b>Agri e duci</b> (AG-Sambuca Di Sicilia)<br><b>Airu e duci</b> (CT-Giarre); ( TP-Castelvetrano, Partanna, Poggio Reale, Salaparuta)<br><b>Auru acitu</b> (AG-Licata)<br><b>Cacitula</b> (AG-Sant'Angelo Muxaro)<br><b>Caracitula</b> (AG-Montevago)<br><b>Cicireddu</b> (TP-Riserva dello Zingaro)<br><b>Gracitula</b> (CL-Butera, Maazarino, Riesi, Sommatino)<br><b>Jathe iembel</b> (PA-Contessa Entellina, Collesano)                                                                                                                                        |
| <i>Papaver rhoeas</i> L. subsp. <i>rhoeas</i><br>( <i>Papaveraceae</i> ) | <b>Paparina russa, Paporinazzu, Paporina</b> (AG-Campobello di Licata, Canicattì, Ravanusa, Montallegro); (CT-Acireale); (CL-Butera, Riesi)                                                                                                                                                                                                                                                                                                                                                                                                                                                                                                              |
| <i>Papaver setigerum</i> DC.<br>( <i>Papaveraceae</i> )                  | <b>Paparina manza</b> (TP-Partitico); (PA-Petralia Soprana)                                                                                                                                                                                                                                                                                                                                                                                                                                                                                                                                                                                              |
| <i>Petroselinum sativum</i> Hoffm.<br>( <i>Apiaceae</i> )                | <b>Pidrusino, Piddusino</b> (TP-Erice, Valderice, Mazara del Vallo)<br><b>Pitrusino</b> (TP-Erice, Gibellina, Salemi, Vita)<br><b>Pitrusinu</b> (PA-Bisaquino); (AG-Campobello di Licata, Canicattì, Ravanusa)                                                                                                                                                                                                                                                                                                                                                                                                                                           |
| <i>Phagnalon saxatile</i> (L.) Cass.<br>( <i>Asteraceae</i> )            | <b>Rosamarina sarvaggia femminina</b> (AG-Sant'Angelo Muxaro)                                                                                                                                                                                                                                                                                                                                                                                                                                                                                                                                                                                            |
| <i>Phlomis fruticosa</i> L.<br>( <i>Lamiaceae</i> )                      | <b>Salvia</b> (CL-Butera, Mazzarino, Riesi.Sommatino)<br><b>Sarbia</b> (CL-Butera , Riesi)<br><b>Sarvia sarvaggia</b> (AG-Cianciana)<br><b>Sucameli</b> (AG-Raffadali)                                                                                                                                                                                                                                                                                                                                                                                                                                                                                   |
| <i>Picris echioides</i> L.<br>( <i>Asteraceae</i> )                      | <b>Asparedda</b> (AG-Aragona, Sant'Angelo Muxaro)<br><b>spinedda</b> (TP-Vita); (PA-San Cipiriello, Roccamena)<br><b>Spiredda</b> (PA-Castelbuono)                                                                                                                                                                                                                                                                                                                                                                                                                                                                                                       |
| <i>Pinus pinea</i> L.<br>( <i>Pinaceae</i> )                             | <b>Pinu</b> (AG-Canicattì, Ravanusa)                                                                                                                                                                                                                                                                                                                                                                                                                                                                                                                                                                                                                     |
| <i>Pistacia vera</i> L.<br>( <i>Anacardiaceae</i> )                      | <b>Festuca</b> (AG-Canicattì, Campobello di Licata, Ravanusa)<br><b>Pastuca</b> (SR-Noto, Avola); (CT-Brolo)                                                                                                                                                                                                                                                                                                                                                                                                                                                                                                                                             |
| <i>Pisum sativum</i> L. subsp. <i>sativum</i><br>( <i>Fabaceae</i> )     | <b>Casola, Piseddri</b> (AG-Sambuca Di Sicilia)                                                                                                                                                                                                                                                                                                                                                                                                                                                                                                                                                                                                          |
| <i>Pyrus amygdaliformis</i> Vill.<br>( <i>Rosaceae</i> )                 | <b>Prainu</b> (ME-Mistretta)                                                                                                                                                                                                                                                                                                                                                                                                                                                                                                                                                                                                                             |
| <i>Plantago lagopus</i> L.<br>( <i>Plantaginaceae</i> )                  | <b>Cutidduzzi</b> (ME-Mistretta)                                                                                                                                                                                                                                                                                                                                                                                                                                                                                                                                                                                                                         |
| <i>Plantago serraria</i> L.<br>( <i>Plantaginaceae</i> )                 | <b>Cutidduzzu</b> (ME-Santo Stefano di Camastra)                                                                                                                                                                                                                                                                                                                                                                                                                                                                                                                                                                                                         |
| <i>Portulaca oleracea</i> L.<br>( <i>Portulacaceae</i> )                 | <b>Burdulaca</b> (TP-Pantelleria)<br><b>Cucciara</b> (SR-Pachino)<br><b>Pirciddana</b> (PA-Pollina)<br><b>Porcellana</b> (AG-Linosa)<br><b>Pucciddana</b> (CT-Nicolosi, Zafferana, Linguaglossa, Ragaina, Belpasso); (ME-Isole Eolie)<br><b>Puccillana</b> (CT-Maletto, Bronte, Biancavilla)<br><b>Purciddana</b> (PA-Bisaquino); (ME-Galati Mamertino, San Fratello, San Marco d' Alunzio, Tortorici); (CT-S. Giovanni la Punta, Pedara, S.Venerina, Zafferana, Milo, Linguaglossa, Castiglione, Adrano,)<br><b>Purciddana</b> (AG-Cattolica Eraclea, Sambuca Di Sicilia), (PA-San Biagio Platani Castellana Sicula, Corleone, Ganci, Isnello, Pollina, |

|                                                                                                     |                                                                                                                                                                                                                                                                                                                                                                                                                                                                                                                                                                                                                                                                                                                                       |
|-----------------------------------------------------------------------------------------------------|---------------------------------------------------------------------------------------------------------------------------------------------------------------------------------------------------------------------------------------------------------------------------------------------------------------------------------------------------------------------------------------------------------------------------------------------------------------------------------------------------------------------------------------------------------------------------------------------------------------------------------------------------------------------------------------------------------------------------------------|
|                                                                                                     | San Mauro Castelverde, Ustica), (RG-Vittoria); (TPCastelvetrano, Favignana, Levanzo, Partanna, Poggio reale, Salaparuta); (EN-Piazza Armerina)<br><b>Purciddrana</b> (RG-Vittoria), (AG-Ravanusa , Campofranco)<br><b>Purciddrara campofranco</b><br><b>Purcillana</b> (CT-Randazzo)                                                                                                                                                                                                                                                                                                                                                                                                                                                  |
| <i>Prasium majus</i> L.<br>( <i>Lamiaceae</i> )                                                     | <b>Camedriu biancu</b> (TP-Riserva dello Zingaro)<br><b>Erva thè</b> (TP-Favignana),<br><b>Menta sarvaggia</b> (PA-Chiusa Sclafani)<br><b>Tè nustrali</b> (TP-Riserva dello Zingaro)                                                                                                                                                                                                                                                                                                                                                                                                                                                                                                                                                  |
| <i>Prunus dulcis</i> (Miller) D.A Webb.<br>( <i>Rosaceae</i> )                                      | <b>Miennulu</b> (TP-Riserva dello Zingaro)<br><b>Miennula</b> (TP-Trapani, Erice, Valderice, Custonaci, Riserva dello Zingaro)                                                                                                                                                                                                                                                                                                                                                                                                                                                                                                                                                                                                        |
| <i>Prunus spinosa</i> L.<br>( <i>Rosaceae</i> )                                                     | <b>Atrignu</b> (PA-Prizzi)<br><b>Brugnole, trigne</b> (ME-Mistretta)<br><b>Pruna</b> (PA-Chiusa Sclafani)<br><b>Prunu sarvaggiu</b> (PA-Camporeale, Villafrati)<br><b>Vrignola</b> (PA-Ganci, Polizzi Generosa)                                                                                                                                                                                                                                                                                                                                                                                                                                                                                                                       |
| <i>Punica granatum</i> L.<br>( <i>Punicaceae</i> )                                                  | <b>Granatu</b> (AG-Sambuca Di Sicilia); ( PA-Borgetto, Ustica)<br><b>Shege</b> (PA-Contessa Entellina)<br><b>Ranatu</b> (TP-Favignana, Mazara del Vallo, Riserva dello Zingaro)                                                                                                                                                                                                                                                                                                                                                                                                                                                                                                                                                       |
| <i>Raphanus raphanistrum</i> L.<br>( <i>Brassicaceae</i> )                                          | <b>Razza</b> (CT-Nicolosi, S. Giovanni la Punta, Pedara, S. Venerina, Zafferana, Linguaglossa, Castiglione, Randazzo, Adrano, Bronte, Ragaina, Belpasso, Milo)<br><b>Razza ruci</b> ( CT-Maletto)                                                                                                                                                                                                                                                                                                                                                                                                                                                                                                                                     |
| <i>Raphanus raphanistrum</i> L.subsp. <i>landra</i><br>(Moretti) Bonnier<br>( <i>Brassicaceae</i> ) | <b>Alassani</b> (AG-Cattolica Eraclea)<br><b>Amareddi</b> (EN-Enna, Piazza Armerina)<br><b>Mazzaredda</b> (AG-Aragona, Comitini, Favara)<br><b>Razza</b> (PA-Caccamo)<br><b>Spicunedda di lassaru</b> (AG-Sambuca Di Sicilia)<br><b>Vrucculuni</b> , (AG-Siculiana)                                                                                                                                                                                                                                                                                                                                                                                                                                                                   |
| <i>Raphanus raphanistrum</i> L. subsp.<br><i>raphanistrum</i><br>( <i>Brassicaceae</i> )            | <b>Lapistra</b> (PA-Ganci, Pollina, San Mauro Castelverde)<br><b>Razza duci</b> (CT-Maletto)<br><b>Razzi</b> (ME-Mistretta)<br><b>Rraricedda</b> (RG-Vittoria)<br><b>Razza</b> (CT-Nicolosi, S. Giovanni la Punta, Pedara, S. Venerina, Zafferana, Linguaglossa, Castiglione, Randazzo, Adrano, Bronte, Ragaina, Belpasso, Milo)<br><b>Sanapieddu duci</b> (CL-Butera, Riesi)<br><b>Tadduzzu sanapa</b> (PA-Collesano)<br><b>Zarra amara</b> (TP-Favignana)<br><b>Zazzu</b> (TP-Castelvetrano, Partanna)                                                                                                                                                                                                                              |
| <i>Rapistrum rugosum</i> (L.) All.<br>( <i>Brassicaceae</i> )                                       | <b>Mazzaredda</b> (AG-Licata)<br><b>Sinapina</b> (AG-Vittoria)                                                                                                                                                                                                                                                                                                                                                                                                                                                                                                                                                                                                                                                                        |
| <i>Reichardia picroides</i> (L.) Roth.<br>( <i>Asteraceae</i> )                                     | <b>Insalatedda</b> (AG- Canicatti, Campobello di Licata)<br><b>Lattugheddra</b> (AG-Ravanusa)<br><b>Coccialebbra</b> (AG-Favara)<br><b>Caccialebbra</b> (CT-S.Giovanni la Punta, Zafferana, Adrano)<br><b>Caccialebbri</b> (CT-Pedara , S. Venerina , Milo)<br><b>Pirnici, Pirnici duci</b> (CT-Linguaglossa)<br><b>Erva di pinnici</b> (CT-Nicolosi)<br><b>Giallepura</b> (CT-Maletto, Bronte)<br><b>Caccianepura</b> (CT-Castiglione)<br><b>Caccialepura</b> (CT-Randazzo)<br><b>Caccialebbriu</b> (CT-Adrano)<br><b>Caccialepri</b> (CT-Belpasso)<br><b>Scaccialebbra</b> (CT-Ragaina)<br><b>Caccialepre</b> (EN-Piazza Armerina)<br><b>Cattalebra</b> (PA-Petralia Soprana , Petralia sottana)<br><b>Lazzini</b> (ME-Isole Eolie) |

|                                                          |                                                                                                                                                                                                                                                                                                                                                                                                                                                                                                                                                                                                                                                                                                                                                                                                                                                   |
|----------------------------------------------------------|---------------------------------------------------------------------------------------------------------------------------------------------------------------------------------------------------------------------------------------------------------------------------------------------------------------------------------------------------------------------------------------------------------------------------------------------------------------------------------------------------------------------------------------------------------------------------------------------------------------------------------------------------------------------------------------------------------------------------------------------------------------------------------------------------------------------------------------------------|
|                                                          | <b>Scarcitula</b> (PA-Ganci)<br><b>Cacazzina</b> (ME-Tortorici)                                                                                                                                                                                                                                                                                                                                                                                                                                                                                                                                                                                                                                                                                                                                                                                   |
| <i>Ridolfia segetum</i> Moris<br>( <i>Apiaceae</i> )     | <b>Finocchiu anitu</b> (AG-Sant'Angelo Muxaro)                                                                                                                                                                                                                                                                                                                                                                                                                                                                                                                                                                                                                                                                                                                                                                                                    |
| <i>Rosa canina</i> L.<br>( <i>Rosaceae</i> )             | <b>Giarrauta</b> (CT-Bronte)                                                                                                                                                                                                                                                                                                                                                                                                                                                                                                                                                                                                                                                                                                                                                                                                                      |
| <i>Rosmarinus officinalis</i> L.<br>( <i>Lamiaceae</i> ) | <b>Rosamarina</b> (ME-Mistretta, Galati Mamertino, Longi, San Marco di Alunzio, Tortorici, Santo Stefano di Camastra, Isole Eolie); (PA-Bisaquino); (AG-Isole Pelagie); (RG-Vittoria)<br><b>Rosmarina</b> (AG-Aragona, Raffadali, Realmonte, Sant'Angelo Muxaro, San Biagio Platani, Bivona, Burgio, Casteltermini, Cianciana, Lucca Sicula, Ravanusa, Montevago)<br><b>Rosmarinu</b> (AG-Comitini, Licata, Siculiana)<br><b>Rosmarinu, rusamarinu</b> (AG-Campobello di Licata, Canicattì, Ravanusa)<br><b>Rusamarinu</b> (AG-Montallegro); (CT-Acireale Catania)                                                                                                                                                                                                                                                                                |
| <i>Rubia peregrina</i> L.<br>( <i>Rubiaceae</i> )        | <b>Rascalingua</b> (PA-Petralia Soprana, Petralia Sottana)                                                                                                                                                                                                                                                                                                                                                                                                                                                                                                                                                                                                                                                                                                                                                                                        |
| <i>Rubus ulmifolius</i> Schott.<br>( <i>Rosaceae</i> )   | <b>Rivettu</b> (AG-Licata)<br><b>Rovu</b> (AG-Montallegro, Ravanusa); (CT-Catania, Acireale,)<br><b>Ruetto</b> (AG-Raffadali)<br><b>Ruettu</b> (AG-Raffadali, Sant'Angelo Muxaro)<br><b>Ruitti</b> (PA-San Mauro Castelverde)<br><b>Runzi</b> (PA-Castronovo); (TP-Trapani, Calatafimi, Campobello Di Mazara, Castelvetrano, Salemi, San Vito Lo Capo, Valderice)<br><b>Ruvettu</b> (AG-Aragona, Cattolica Eraclea, Comitini, Favara, Siculiana, Burgio, Lucca Sicula, Ravanusa, Montevago); (PA-Borghetto, Lercara Friddi, Partinico, Ustica); (TP- Partanna, Poggio Reale, Salaparuta); (ME-Tortorici, San Marco d'Alunzio, Isole Eolie)<br><b>Ruviettu</b> (AG-Bivona, Casteltermini, Cianciana, Canicattì, Montallegro); (CT-Catania, Acireale); (ME-Galati Mamertino, Mistretta), (AG-Canicattì), (RG-Vittoria)<br><b>Ruvitti</b> (PA-Ganci) |
| <i>Rumex crispus</i> L.<br>( <i>Polygonaceae</i> )       | <b>Apazzu</b> (PA-Lercara Friddi)<br><b>Auru acitu</b> (CL-Butera , Riesi)<br><b>Lapazzu</b> (AG-Aragona, Butera, Comitini, Siculiana)                                                                                                                                                                                                                                                                                                                                                                                                                                                                                                                                                                                                                                                                                                            |
| <i>Rumex scutatus</i> L.<br>( <i>Polygonaceae</i> )      | <b>Acitula</b> (CT-Nicolosi),<br><b>Acitura</b> (CT-Randazzo)<br><b>Ocitura</b> (CT-Maletto)<br><b>Citulidda</b> (CT-Linguaglossa)                                                                                                                                                                                                                                                                                                                                                                                                                                                                                                                                                                                                                                                                                                                |
| <i>Rumex thyrsoides</i> Desf.<br>( <i>Polygonaceae</i> ) | <b>Acitura</b> (CT-Randazzo, Maletto)                                                                                                                                                                                                                                                                                                                                                                                                                                                                                                                                                                                                                                                                                                                                                                                                             |
| <i>Ruscus aculeatus</i> L.<br>( <i>Liliaceae</i> )       | <b>Bammuschitta</b> (CT-Randazzo)<br><b>Bammuscittu</b> (CT-Maletto, Bronte, Mistretta)<br><b>Buscu, Puci pulci, Spina scuparina</b> (TP-Riserva dello Zingaro)<br><b>Grattacula</b> (PA-Chiusa Sclafani)<br><b>Grattaculo</b> (EN-Piazza Armerina)<br><b>Scuparini</b> (ME-Mistretta)<br><b>Spinaprucci</b> (CT-Bronte); (TP-Marettimo, Riserva dello Zingaro)<br><b>Spinapurci</b> (CT-Randazzo)<br><b>Sineddu</b> (PA-Grisi)<br><b>Sparabuschi</b> (ME-San Fratello)<br><b>Sparaceddi, Sparaci, Sparaci trona servaggi</b> (TP-Marittimo, Trapani, Erice, Custonaci)<br><b>Sparaci di scupazzu</b> (PA-Ganci)<br><b>Sparaci scuparini</b> (PA-Caccamo, Castelbuono, Piana degli Albanesi, Pollina)<br><b>Sparaciu di vadduna</b> (CT-Zafferana)                                                                                                |

|                                                                       |                                                                                                                                                                                                                                                                                                                                                                                                                                                                                                                                                                                                                                                                                                                                                                                    |
|-----------------------------------------------------------------------|------------------------------------------------------------------------------------------------------------------------------------------------------------------------------------------------------------------------------------------------------------------------------------------------------------------------------------------------------------------------------------------------------------------------------------------------------------------------------------------------------------------------------------------------------------------------------------------------------------------------------------------------------------------------------------------------------------------------------------------------------------------------------------|
|                                                                       | <p><b>Sparaciu sarvaggiu</b> (PA-Petralia Soprana, Petralia Sottana)<br/> <b>Sparaciu 'mpiriali</b> (CT-S. Giovanni la Punta)<br/> <b>Sparacogna</b> (CT-Castiglione, Nicolosi, Pedara)<br/> <b>Spinapruci</b> (ME-Mistretta)<br/> <b>Spinapulci, Sparacogna</b> (CT-Nicolosi, Pedara)<br/> <b>Spinapulici</b> (ME-Mistretta, Naso); (CT-Castiglione, S. Giovanni la Punta, S. Venerina, Zafferana, Adrano, Ragaina)<br/> <b>Spinocciuoli</b> (ME-Tortorici)<br/> <b>Taddispruni</b> (CT-Linguaglossa)<br/> <b>Taddispruni</b> (ME-Mistretta)</p>                                                                                                                                                                                                                                  |
| <i>Ruscus hypoglossum</i> L.<br>( <i>Liliaceae</i> )                  | <p><b>Sparaci di tronu</b> (AG-Aragona)<br/> <b>Aparaciu</b> (AG- Montallegro); (CT-Catania , Acireale)</p>                                                                                                                                                                                                                                                                                                                                                                                                                                                                                                                                                                                                                                                                        |
| <i>Ruscus hypophyllum</i> L.<br>( <i>Liliaceae</i> )                  | <p><b>Sparaciu 'mpriacu</b> (CT-Adrano)<br/> <b>Sparaciu 'mpiriali</b> (CT-Adrano, Linguaglossa)<br/> <b>Sparaciu di Spagna</b> (CT-Castiglione)<br/> <b>Sparaciu di salamunia</b> (CT-Milo, S. Venerina)<br/> <b>Sparaciu di Bordura</b> (CT-San Giovanni la Punta)</p>                                                                                                                                                                                                                                                                                                                                                                                                                                                                                                           |
| <i>Salvia officinalis</i> L.<br>( <i>Lamiaceae</i> )                  | <p><b>Salvia</b> (AG-Campobello di Licata, Canicattì, Ravanusa Montevago, Sambuca di Sicilia); (CL-Caltanissetta, Delia); (TP- Trapani, Erice, Valderice, Custonaci, Castelvetro, Favignana, Partanna, Poggio Reale Salaparuta); (PA-Partitico, Piana degli Albanesi, Ustica); (RG-Vittoria)<br/> <b>Sarvia</b> (AG-Realmonte, Aragona, San Biagio Platani); (ME-Mistretta, Isole Eolie); (PA-Bisaquino, Castronovo, Corleone, Roccamena, San Giuseppe Jato); (RG- Vittoria)</p>                                                                                                                                                                                                                                                                                                   |
| <i>Salvia sclarea</i> L.<br>( <i>Lamiaceae</i> )                      | <p><b>Erva muscatiddara</b> (PA-Caccamo, Castellana Sicula, Geraci Siculo, Prizzi)<br/> <b>Musciddara</b> (CL-Mussomeli)<br/> <b>Salvia</b> (SR-Noto)</p>                                                                                                                                                                                                                                                                                                                                                                                                                                                                                                                                                                                                                          |
| <i>Sambucus nigra</i> L.<br>( <i>Caprifoliaceae</i> )                 | <p><b>Savuiccu, Savucu</b> (CL-Mussomeli); (PA-Castellana Sicula)<br/> <b>Sammuccu, Savucu</b> (PA-Bisaquino)</p>                                                                                                                                                                                                                                                                                                                                                                                                                                                                                                                                                                                                                                                                  |
| <i>Scolymus grandiflorus</i> Desf.<br>( <i>Asteraceae</i> )           | <p><b>Pepellu</b> (CL-Butera, Mazzarino, Riesi, Sommatino)<br/> <b>Rattameli</b> (CT-Linguaglossa)<br/> <b>Scoddi</b> (Adrano, Biancavilla, Regaina, Belpasso)<br/> <b>Scoddi</b> (AG-Favara, Siculiana Bivona, Casteltermini, Cianciana, Canicattì)<br/> <b>Scoddu</b> (CT-Giarre)<br/> <b>Scolli</b> (CT-Randazzo , Maletto, Bronte)<br/> <b>Scuoddi</b> (ME-Mistretta)<br/> <b>Scuoddu, Scuedda, Scoddi</b> (PA-Caccamo, Collesano, Ganci, San Giuseppe Jato, San Mauro Castelverde)<br/> <b>Scuddu, Scoddo, Scoddi</b> (TP-Busetto Palizzolo, Castellammare del Golfo, Castelvetro, Custonaci, Levanzo, Favignana, Marettimo, Partanna, Poggio Reale, Salaparuta, San Vito lo Capo, Valderice, Vita, Riserva dello Zingaro)<br/> <b>Zammuri di campagna</b> (CT-Zafferana)</p> |
| <i>Scolymus hispanicus</i> L.<br>( <i>Asteraceae</i> )                | <p><b>Scoddu</b> (PA-Vicari)<br/> <b>Spina bianca</b> (AG-Sant'Angelo Muxaro)</p>                                                                                                                                                                                                                                                                                                                                                                                                                                                                                                                                                                                                                                                                                                  |
| <i>Scolymus maculatus</i> L.<br>( <i>Asteraceae</i> )                 | <p><b>Scoddu</b> (AG-Cattolica Eraclea, Sant'Angelo Muxaro, San Biagio Platani)<br/> <b>Scuoddo</b> (CL-Butera, Riesi)<br/> <b>Scuoddu</b> (PA-Valledolmo, Collesano)</p>                                                                                                                                                                                                                                                                                                                                                                                                                                                                                                                                                                                                          |
| <i>Silene vulgaris</i> (Moench.) Garcke<br>( <i>Caryophyllaceae</i> ) | <p><b>Calicedda di muru</b> (CT-Biancavilla)<br/> <b>Calicedda i mura</b> (CT-Adrano)<br/> <b>Cannatella</b> (CT-Randazzo)<br/> <b>Ebba priricatura</b> (CT-Bronte)<br/> <b>Cannatedda</b> (CT-Nicolosi, S. Giovanni la Punta, S. Venerina, Zafferana, Milo, Linguaglossa, Ragaina, Belpasso)<br/> <b>Erba du pridicatori</b> (CT-Randazzo)<br/> <b>Erba pridicatori</b> (CT-Castiglione)<br/> <b>Campanedda</b> (CT-Pedara, Zafferana)</p>                                                                                                                                                                                                                                                                                                                                        |

|                                                                                                                       |                                                                                                                                                                                                                                                                                                                                                                                                                                                                                                                                           |
|-----------------------------------------------------------------------------------------------------------------------|-------------------------------------------------------------------------------------------------------------------------------------------------------------------------------------------------------------------------------------------------------------------------------------------------------------------------------------------------------------------------------------------------------------------------------------------------------------------------------------------------------------------------------------------|
|                                                                                                                       | <b>Erva ru prricaturi</b> (CT-Maletto)<br><b>Priricaturi</b> (CT-Randazzo)                                                                                                                                                                                                                                                                                                                                                                                                                                                                |
| <i>Silene vulgaris</i><br>(Moench.) Garcke subsp. <i>angustifolia</i><br>(Miller) Hayek<br>( <i>Caryophyllaceae</i> ) | <b>Calicedda di muru</b> (CT-Biancavilla)<br><b>Calicedda i mura</b> (CT-Adrano)<br><b>Campanedda</b> (CT-Pedara Zafferana)<br><b>Cannatedda</b> (CT-Nicolosi, S. Giovanni la Punta, S. Venerina, Zafferana, Milo, Linguaglossa, Ragaina, Belpasso)<br><b>Cannatella, Erba du prricaturi, Pricaturi</b> (CT-Randazzo)<br><b>Ebba prricatura</b> (CT-Bronte)<br><b>Erba pridicatura</b> (CT-Castiglione)<br><b>Erva ru prricaturi</b> (CT-Maletto)<br><b>Scaf'ti'nfrunti</b> (EN-Piazza Armerina)                                          |
| <i>Silybum marianum</i> L.<br>( <i>Asteraceae</i> )                                                                   | <b>Cardu marianu</b> (TP-Riserva dello Zingaro)<br><b>Cardunazzu</b> (TP-Zingaro, Canicatti)<br><b>Cardunciu</b> (PA-Ganci)<br><b>Crox</b> (PA-San Mauro Castelverde),<br><b>Mianu</b> (TP-Zingaro)<br><b>Piscia l'asinu</b> (AG-Campobello di Licata)                                                                                                                                                                                                                                                                                    |
| <i>Sinapis alba</i> L.<br>( <i>Brassicaceae</i> )                                                                     | <b>Lassani</b> (AG-Bivona)<br><b>Mazzareddu, Arazzi</b> (AG-Canicatti)                                                                                                                                                                                                                                                                                                                                                                                                                                                                    |
| <i>Sinapis arvensis</i> L.<br>( <i>Brassicaceae</i> )                                                                 | <b>Alassani</b> (AG-Raffadali)<br><b>Qualeddu</b> (TP-Busetto Palizzolo, Campobello di Mazara, Custonaci, Erice, Valderice)                                                                                                                                                                                                                                                                                                                                                                                                               |
| <i>Sisymbrium officinale</i> (L.) Scop.<br>( <i>Brassicaceae</i> )                                                    | <b>Lassani duci</b> (TP-Zingaro)<br><b>Lassinu di sceccu</b> (TP-Zingaro)<br><b>Lssaneddi</b> (TP-Zingaro)<br><b>Mazzareddri</b> (ME-Mistretta)<br><b>Sciuriti, Ciunciuli</b> (PA-Ganci)                                                                                                                                                                                                                                                                                                                                                  |
| <i>Sisymbrium irio</i> L.<br>( <i>Brassicaceae</i> )                                                                  | <b>Aprocchiu</b> (AG-Favara)                                                                                                                                                                                                                                                                                                                                                                                                                                                                                                              |
| <i>Smilax aspera</i> L.<br>( <i>Smilacaceae</i> )                                                                     | <b>Cafaretra</b> (ME-Santo Stefano di Camastra)<br><b>Cannactura</b> (CT-Castiglione)<br><b>Gratta culu, Ratta culu, Liara, Sarsa siciliana, Sciracausi, Erva serretta</b> (TP-Zingaro)<br><b>Raja</b> (CT-Nicolosi, S. Giovanni la Punta, Pedara, S. Venerina, Linguaglossa, Randazzo, Ragaina, Belpasso)<br><b>Strazzacammissi</b> (CT-Maletto, Bronte)<br><b>Ugna di attu</b> (CT-Adrano)<br><b>Ugna ri gattu</b> (CT-Bronte)                                                                                                          |
| <i>Smyrniolum olusatrum</i> L.<br>( <i>Apiaceae</i> )                                                                 | <b>Accia sarvaggia</b> (AG-Lucca Sicula)<br><b>Laccia sarvaggia</b> (ME-Salina)                                                                                                                                                                                                                                                                                                                                                                                                                                                           |
| <i>Sonchus asper</i> L.<br>( <i>Asteraceae</i> )                                                                      | <b>Cardedda</b> (ME-Mistretta); (CT-Linguaglossa, Belpasso, Milo, Pedara, Zafferana)<br><b>Cardedda mascula</b> (CT-Adrano)<br><b>Cardedda masculina</b> (AG-Sambuca Di Sicilia, Sant'Angelo Muxaro); (CT-Castiglione, Ragaina, San Giovanni La Punta, Santa Venerina)<br><b>Cardedda di cani</b> (AG-Favara)<br><b>Cardedda di puorci</b> (CL-Mussomeli)<br><b>Cardedda spinusa</b> (CT-Nicolosi, Maletto, Bronte)<br><b>Cardedda ri porci</b> (CT-Bronte)<br><b>Cardedda niura</b> (CT-Nicolosi)<br><b>Cardedda russa</b> (CT-Randazzo) |
| <i>Sonchus asper</i> (L.) Hill subsp. <i>nymanii</i><br>(Tineo et Guss.) Hegi<br>( <i>Asteraceae</i> )                | <b>Cardedda</b> (Collesano)                                                                                                                                                                                                                                                                                                                                                                                                                                                                                                               |
| <i>Sonchus oleraceus</i> L.<br>( <i>Asteraceae</i> )                                                                  | <b>Cardedda</b> (AG-Cattolica Eraclea, Licata, Raffadali); (PA-Borgetto, Camporeale, Castelbuono, Geraci Siculo, Grisi, Lercara Friddi,                                                                                                                                                                                                                                                                                                                                                                                                   |



|                                                                         |                                                                                                                                                                                                                                                                                                                                                                                                                                                                                                                                                                                                                                                                                                                                                                                                                                                                                                    |
|-------------------------------------------------------------------------|----------------------------------------------------------------------------------------------------------------------------------------------------------------------------------------------------------------------------------------------------------------------------------------------------------------------------------------------------------------------------------------------------------------------------------------------------------------------------------------------------------------------------------------------------------------------------------------------------------------------------------------------------------------------------------------------------------------------------------------------------------------------------------------------------------------------------------------------------------------------------------------------------|
|                                                                         | <p>Palazzo Adriano, Petralia Soprana, Pollina, Prizzi, San Mauro Castelverde, Vicari, Ustica); (TP-Partanna); (CT-Belpasso, Bronte , Linguaglossa, Milo, Pedara, Zafferana); (ME-Isole Eolie, Mistretta); (RG-Vittoria)</p> <p><b>Cardedda bianca</b> (PA-Petralia Soprana, Petralia Sottana); (CT-Randazzo)</p> <p><b>Cardedda femminina</b> (AG-Sambuca Di Sicilia)</p> <p><b>Cardedda fimmina</b> (CT-Adrano)</p> <p><b>Cardedda fimminedda</b> (CT-Castiglione, Ragaina, San Giovanni La Punta, Santa Venerina)</p> <p><b>Cardedda janca</b> (CT-Maletto)</p> <p><b>Cardedda liscia</b> (CT-Nicolosi, Maletto)</p> <p><b>Cardedda scucivola</b> (AG-Aragona, Realmonte)</p> <p><b>Cardella</b> (AG-Isole Pelagie)</p> <p><b>Cardetra</b> (AG-Sant'Angelo Muxaro, San Biagio Platani)</p> <p><b>Scarola</b> (AG-Canicattì)</p>                                                                  |
| <i>Sonchus tenerrimus</i> L.<br>( <i>Asteraceae</i> )                   | <p><b>Cardedda</b> (ME-Isole Eolie); (PA-Caccamo, Castellana Sicula, Corleone, Ganci, San Giuseppe Jato, San Mauro Castelverde, Ustica); (TP-Levanzo, Marettime, Favignana)</p> <p><b>Cardedda femminina</b> (CL-Campofranco, Sutera)</p> <p><b>Cardedda scucivola</b>, <b>Cardeddra</b> (CL-Caltanissetta, San Cataldo, Serradifalco)</p> <p><b>Cardella</b> (AG-Isole Pelagie)</p> <p><b>Kardedda</b> (RG-Vittoria)</p> <p><b>Spargola</b> (CL-Butera, Riesi); (AG-Realmonte, Siculiana)</p>                                                                                                                                                                                                                                                                                                                                                                                                     |
| <i>Sorbus domestica</i> L.<br>( <i>Rosaceae</i> )                       | <b>Zorba</b> (AG-Sambuca di Sicilia); (Pa-Partinico)                                                                                                                                                                                                                                                                                                                                                                                                                                                                                                                                                                                                                                                                                                                                                                                                                                               |
| <i>Tamus communis</i> L.<br>( <i>Dioscoreaceae</i> )                    | <p><b>Sparaciu arrampicusu</b> (PA-Castelbuono)</p> <p><b>Sparaci cuccu</b> (PA-Caccamo)</p> <p><b>Sparaci cuccu</b>, <b>Sparaci di serpa</b>, <b>Sparaci i' serpi</b></p> <p><b>Sparaci di serpa</b> (PA-Chiusa Sclafani)</p> <p><b>Sparaci i serpi</b> (PA-Ganci , San Mauro Castelverde)</p> <p><b>Sparaciu 'mpiariali</b> (CT-Milo,</p> <p><b>Sparaciu impiariali</b> CT-Ragaina)</p> <p><b>Sparaciu di lupu</b> (AG-Burgio, Lucca Sicula, Ravanusa)</p> <p><b>Sparaciu di serpa</b> (AG-Cammarata, Cianciana)</p> <p><b>Sparaciu di tronu</b> (PA-Bisaquino)</p> <p><b>Sparacogni</b> (CT-Maletto , Bronte, Adrano, Biancavilla)</p> <p><b>Sparacognu</b> (CT-Maletto)</p> <p><b>Sparacuogna</b> (CT-Randazzo)</p> <p><b>Tamusceddi</b> (CT-Piazza Armerina)</p> <p><b>Viddiceddu</b> (CT-Castiglione)</p> <p><b>Virriceddu</b> (CT-Castiglione)</p> <p><b>Viticeddu</b> (CT-Castiglione)</p> |
| <i>Tanacetum vulgare</i> L.<br>( <i>Asteraceae</i> )                    | <b>Tannavira</b> (ME-Tortorici)                                                                                                                                                                                                                                                                                                                                                                                                                                                                                                                                                                                                                                                                                                                                                                                                                                                                    |
| <i>Taraxacum officinale</i> Weber<br>( <i>Asteraceae</i> )              | <b>Tarassacu</b> , <b>Erba di pirnici</b> , <b>Piscialetto</b> (CL-Caltanissetta, San Cataldo, Serradifalco)                                                                                                                                                                                                                                                                                                                                                                                                                                                                                                                                                                                                                                                                                                                                                                                       |
| <i>Teucrium fruticans</i> L.<br>( <i>Lamiaceae</i> )                    | <b>Ricutedda</b> (CL-Butera)                                                                                                                                                                                                                                                                                                                                                                                                                                                                                                                                                                                                                                                                                                                                                                                                                                                                       |
| <i>Teucrium scordium</i> L.<br>( <i>Lamiaceae</i> )                     | <b>Scordiu</b> (PA-Bisaquino)                                                                                                                                                                                                                                                                                                                                                                                                                                                                                                                                                                                                                                                                                                                                                                                                                                                                      |
| <i>Thymus capitatus</i> (L.) Hoffmanns. et Link<br>( <i>Lamiaceae</i> ) | <p><b>Santariiedda</b> (RG-Vittoria)</p> <p><b>Santariieddu</b> (CL-Campofranco, Sutera)</p> <p><b>Sataredda</b> (AG-Cattolica Eraclea, Sambuca di Sicilia, San Biagio Platani, Siciliana, Raffadali)</p> <p><b>Satareddu</b> (TP-Castelvetrano, Favignana, Partanna, Poggio Reale, Salaparuta)</p> <p><b>Sitaredda</b> (AG-Isole Pelagie)</p> <p><b>Timu</b> (EN-Piazza Armerina), (TP-Erice)</p>                                                                                                                                                                                                                                                                                                                                                                                                                                                                                                 |
| <i>Thymus spinulosus</i> Ten.                                           | <b>Timo</b>                                                                                                                                                                                                                                                                                                                                                                                                                                                                                                                                                                                                                                                                                                                                                                                                                                                                                        |

|                                                                                                       |                                                                                                                                                                                                                                                                                                                                                                                                                                                                |
|-------------------------------------------------------------------------------------------------------|----------------------------------------------------------------------------------------------------------------------------------------------------------------------------------------------------------------------------------------------------------------------------------------------------------------------------------------------------------------------------------------------------------------------------------------------------------------|
| ( <i>Lamiaceae</i> )                                                                                  |                                                                                                                                                                                                                                                                                                                                                                                                                                                                |
| <i>Tolpis virgata</i> (Desf.) Bertol.<br>( <i>Asteraceae</i> )                                        | <b>Erba janca</b> (CT-Linguaglossa)<br><b>Gallinella</b> (CT-Maletto)<br><b>Lattuchedda</b> (CT-Nicolosi)<br><b>Scaluredda</b> (CT-Belpasso, Zafferana)                                                                                                                                                                                                                                                                                                        |
| <i>Tragopogon crocifolius</i> L.<br>( <i>Asteraceae</i> )                                             | <b>Barbabeccchi</b> (CT-Randazzo)<br><b>Brambascu</b> (CT-Linguaglossa)<br><b>Cuttuneddu</b> (CT-Nicolosi)<br><b>Erva di S. Petru</b> (CT-Pedara)<br><b>Lattaroli</b> (CT-Maletto)<br><b>Pampasciuscia</b> (CT-Nicolosi)<br><b>Latti d'aceddu</b> (CT-S. Giovanni la Punta , Zafferana, Milo)<br><b>Pedi di lupu</b> (Castiglione)<br><b>Percia canedda</b> (AG-Sant'Angelo Muxaro)<br><b>Pistalaceddi</b> (CT-Zafferana)<br><b>Stuppacannedda</b> (CT-Pedara) |
| <i>Tragopogon porrifolius</i> L. subsp.<br><i>australis</i> (Jordan) Br.-Bl.<br>( <i>Asteraceae</i> ) | <b>Erba di gnagnaru pilusa</b> (CL-Caltanissetta)<br><b>Pedi di gaddru</b> (CL-Butera, Mazzarino, Riesi, Sommatino)<br><b>Perciacannedda</b> (PA-Lercara Friddi , Mussomeli)<br><b>Reggia</b> (EN-Piazza Armerina)<br><b>Varva di beccu</b> (CL-Caltanissetta)                                                                                                                                                                                                 |
| <i>Urospermum dalechampii</i> L.Schmidt<br>( <i>Asteraceae</i> )                                      | <b>Cartedda, Cicoria sarvaggia, Scursunera giara</b> (PA-Palermo, Chiusa Sclafani, Collesano, Lercara Friddi, Palazzo Adriano, Prizzi, Vicari )<br><b>Cuosti i porci</b> (ME-Mistretta)<br><b>Cicoina</b> (ME-Tortorici, Santo Stefano di Camastra)                                                                                                                                                                                                            |
| <i>Urospermum picroides</i> L.Schmidt.<br>( <i>Asteraceae</i> )                                       | <b>Coccialebbra</b> (AG-Sant'Angelo Muxaro)<br><b>Bukeriepur</b> (PA-Piana Degli Albanesi)                                                                                                                                                                                                                                                                                                                                                                     |
| <i>Urtica membranacea</i> Poiret<br>( <i>Urticaceae</i> )                                             | <b>Addricula</b> (AG-Bivona)<br><b>Ardicela</b> (PA-Bisaquino), (AG-Aragona, Realmonte, Montevago)<br><b>Ardichi</b> (PA-Castelbuono)<br><b>Lurida</b> (PA-Polizzi Generosa), (AG-Favara, San Biagio Platani)<br><b>Ziculiedda</b> (AG-Sant'Angelo Muxaro)                                                                                                                                                                                                     |
| <i>Urtica urens</i> L.<br>( <i>Urticaceae</i> )                                                       | <b>Arzicula, ardica</b> (PA-Ustica)                                                                                                                                                                                                                                                                                                                                                                                                                            |
| <i>Valerianella eriocarpa</i> Desf.<br>( <i>Valerianaceae</i> )                                       | <b>Gaddinedda , periciocca, lattughedda</b> (TP-Riserva dello Zingaro)                                                                                                                                                                                                                                                                                                                                                                                         |
| <i>Veronica anagallis-aquatica</i> L.<br>( <i>Scrophulariaceae</i> )                                  | <b>Crisciuni, scavuni</b> (CL-Caltanissetta)                                                                                                                                                                                                                                                                                                                                                                                                                   |
| <i>Vitis vinifera</i> L.<br>( <i>Vitaceae</i> )                                                       | <b>Zuccu, Racina</b> (TP-Erice, Custonaci, Valderice)<br><b>Racina, Vigna, Vigni,</b><br><b>Viti</b> (TP-Riserva dello Zingaro)<br><b>Racina, Vigna, Viti Zuccu</b> (TP-Mazara del Vallo)                                                                                                                                                                                                                                                                      |

The names reported in brackets refer to the villages where a food ethnobotanical use was registered; the code to the provinces where the villages belong to:  
AG-Agrigento; CL-Caltanissetta; CT-Catania; EN-Enna; ME-Messina, PA-Palermo; RG-Ragusa; SR-Siracusa; TP-Trapani (The Egadi Islands (Favignana, Levanzo and Marittimo) and the island of Pantelleria are part of the Trapani province; the Eolian Islands (Alicudi, Filicudi, Lipari, Panarea, Salina, Stromboli and Vulcano) are part of the Messina province; the Pelagie Islands (Lampedusa and Linosa) are part of the Agrigento province; the Island of Ustica is included in the Palermo province)
